# Supplementary material for: IPMK Mediates Activation of ULK Signaling and Transcriptional Regulation of Autophagy Linked to Liver Inflammation and Regeneration
Source: PubMed Central journal article supplement (PMC6494083; doi:10.1016/j.celrep.2019.02.013), 2019-03-05
Supplement: NIHMS1523265-supplement-1.pdf [file NIHMS1523265-supplement-1.pdf]

**Cell Reports, Volume 26**

**Supplemental Information**

**IPMK Mediates Activation of ULK Signaling  
and Transcriptional Regulation of Autophagy Linked  
to Liver Inflammation and Regeneration**

**Prasun Guha, Richa Tyagi, Sayan Chowdhury, Luke Reilly, Chenglai Fu, Risheng Xu, Adam C. Resnick, and Solomon H. Snyder**

Figure S 1

IPMK  
(untreated)

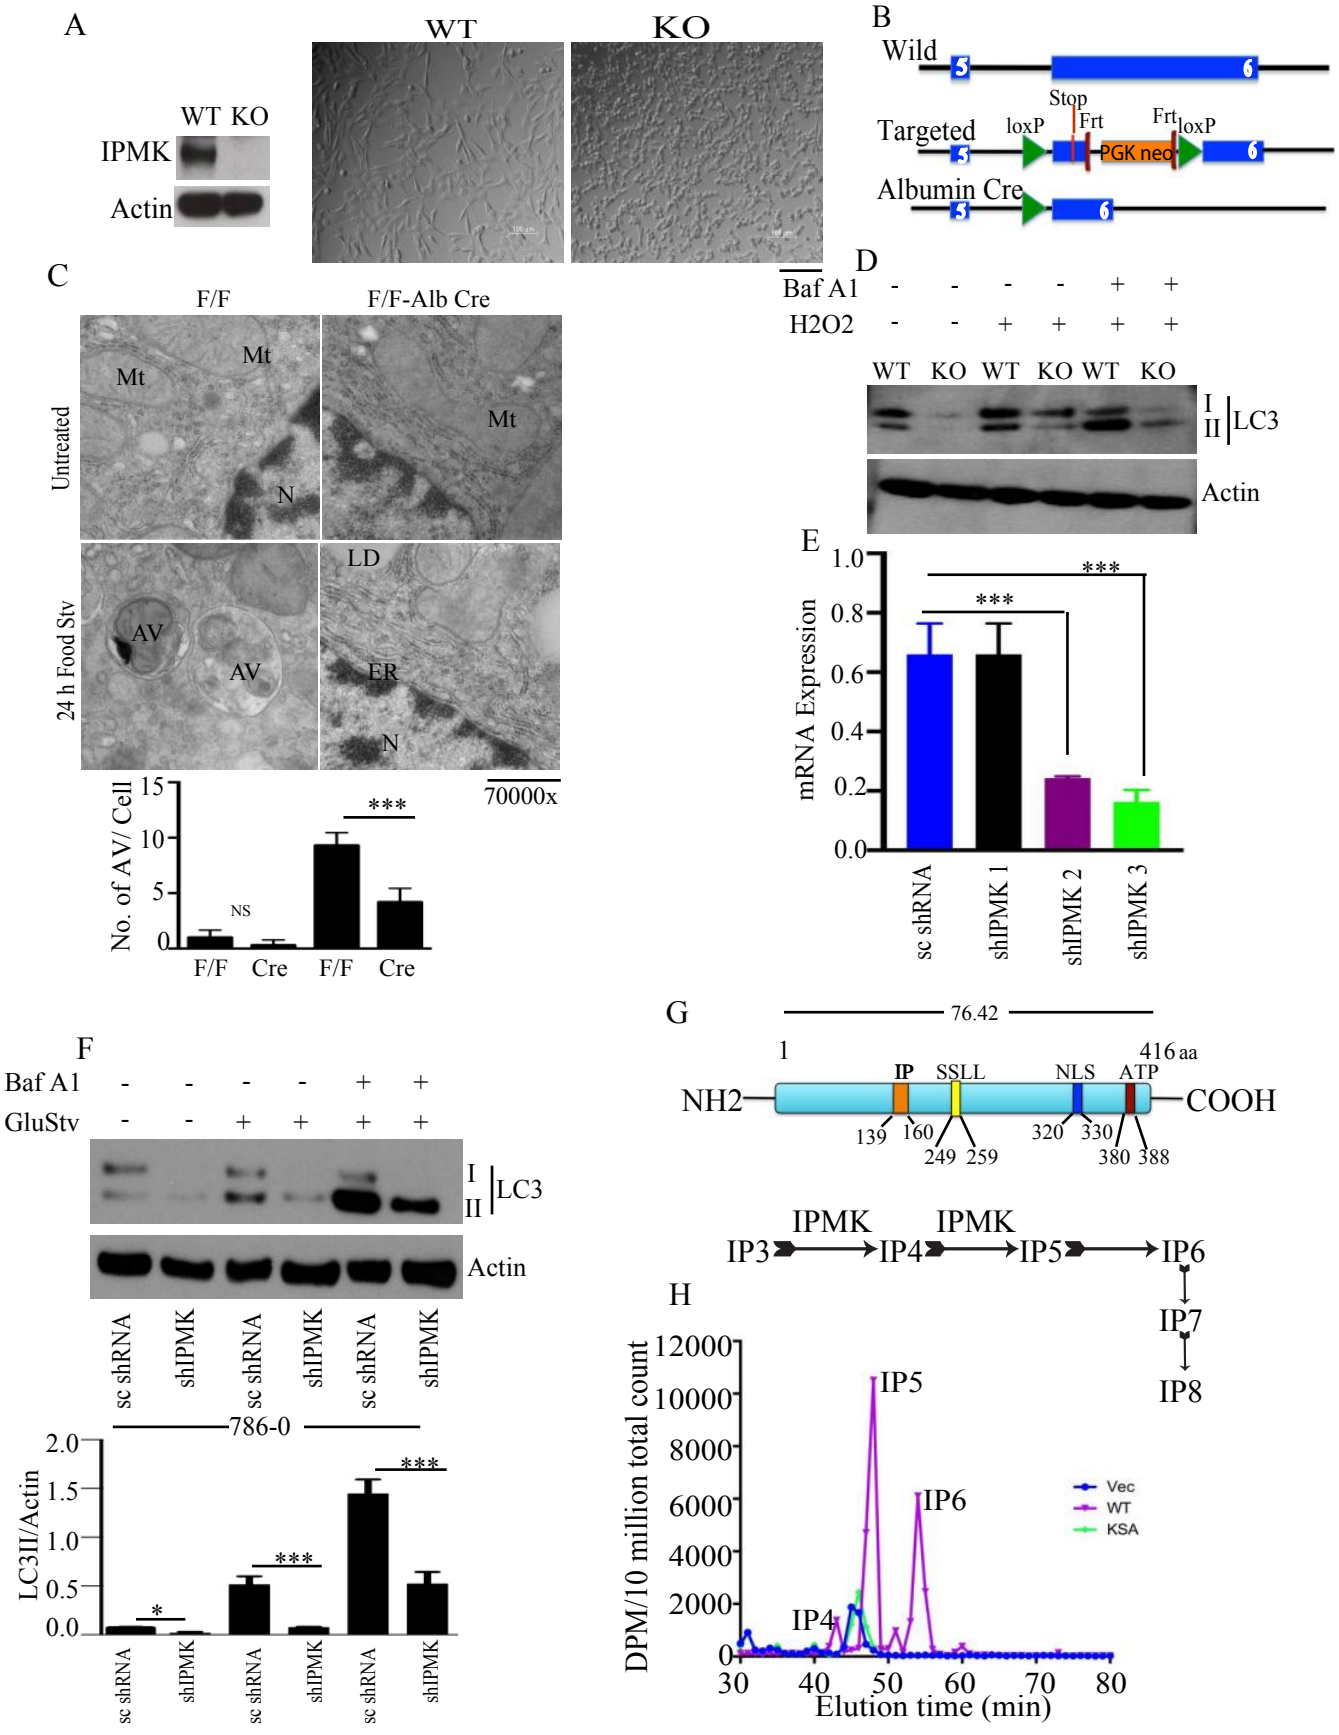

**Figure S1. IPMK is required for autophagy, Related to Figure 1.**

(A) Western blot of IPMK in W and KO MEF. Phase contrast microscopy of W and KO MEFs. Scale bar 100uM. (B) Schematic diagram for generation of conditional IPMK deletion in mice liver. (C) TEM analysis of F/F and F/F-AlbCre (IPMK KO) liver section with and without food for 24 h. Mt- mitochondria, AV- autophagic vacuole, LD- lipid droplet, N- nucleus, and ER- endoplasmic reticulum. Scale bar 500nm. (D) LC3 western blot to study autophagic flux in IPMK W and KO MEF after H<sub>2</sub>O<sub>2</sub> (500uM) and H<sub>2</sub>O<sub>2</sub>+BafA1 treatment for 1h. (E) qPCR analysis of IPMK mRNA expression after shRNA treatment in 786-0 renal cancer cell line. (F) LC3 western blot to study autophagic flux in stably transfected scrambled shRNA and shIPMK (shIPMK3) treated 786-0 renal cancer cells. (G) Schematic map of IPMK protein. Wild type human IPMK is a 76.42-kb gene consisting of 6 exons and 5 introns encoding a 416 amino acid protein with at least 4 structural domains including an inositol phosphate (IP, orange) binding site, Ser-Ser-Leu-Leu catalytically important domain (SSLL, yellow), NLS (nuclear localization signal, blue), and adenosine triphosphate (ATP) binding site (magenta). IPMK catalyzes conversion of IP<sub>3</sub> to IP<sub>4</sub> and IP<sub>5</sub>. (H) HPLC analysis of inositol phosphate levels in IPMK KO rescued by vector control (KO + myc), wild type IPMK (KO + WT), kinase dead IPMK (KO + KSA). Data are means ± SD.

Figure S 2

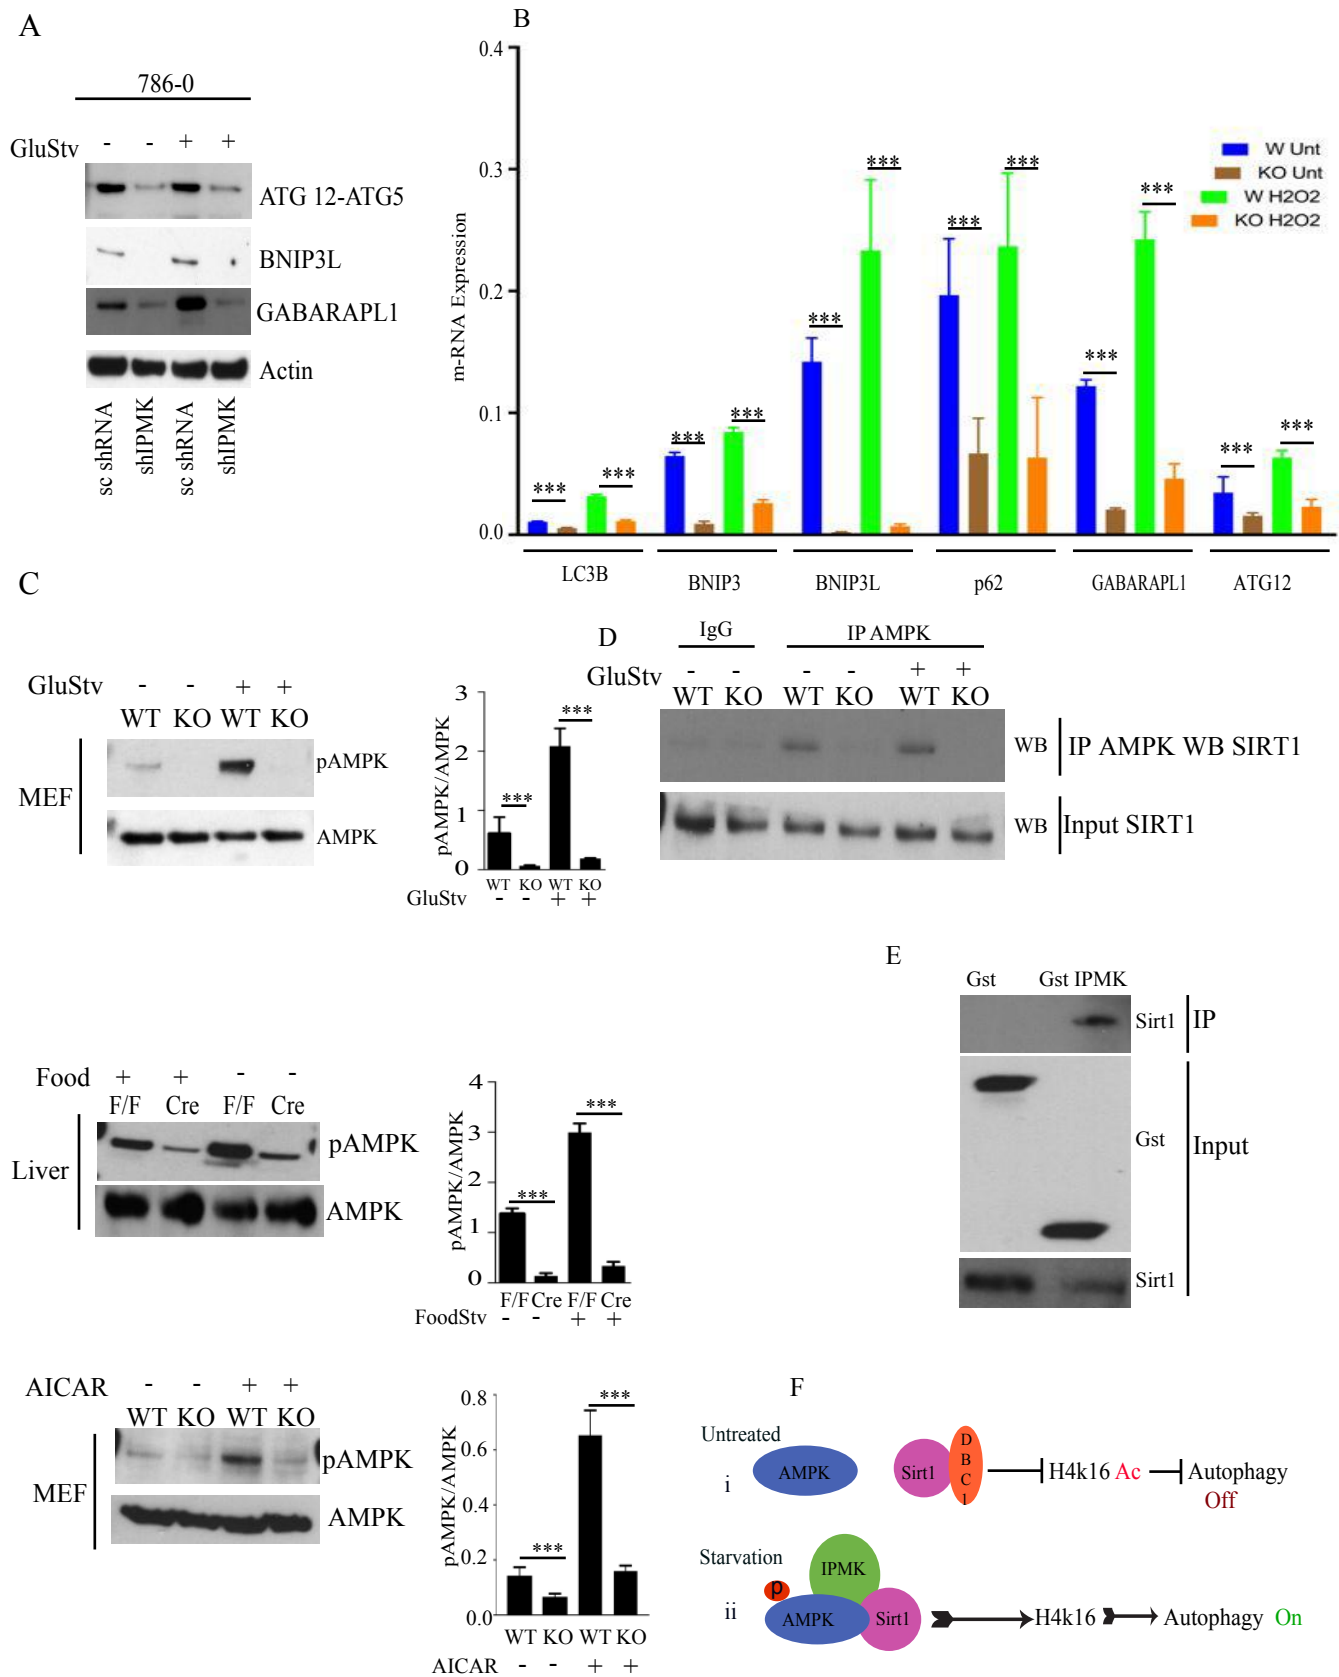

**Figure S2. IPMK enhances transcription of autophagy related genes, Related to Figure 2.**

(A) Western blot of BNIP3L, ATG12 and GABARAPL1 in 786-0 cells stably transfected with scrambled shRNA and shIPMK. (B) qPCR analysis of LC3B, BNIP3, BNIP3L, p62, GABARAPL1, and ATG12 in H<sub>2</sub>O<sub>2</sub> (500uM) treated W/KO MEF. (C) Western blot of phosphoAMPK at Thr 172 in AICAR treated W/KO MEFs and liver tissue from mice. (D) Immunoprecipitation of endogenous AMPK and western blot of endogenous Sirt1. (E) Immunoprecipitation of GST IPMK and western blot of endogenous Sirt1. (F) Schematic diagram of IPMK mediated Sirt1 activation and transcriptional regulation. In untreated cells Sirt1 activity is down-regulated by direct binding of its repressor DBC1. IPMK and AMPK can interact with Sirt1. During glucose starvation IPMK enhances activation of AMPK which enables DBC1 to dissociate from Sirt1 followed by deacetylation of H4K16 and activation of autophagy related gene transcription. Data are means  $\pm$  SD.

Figure S 3

A

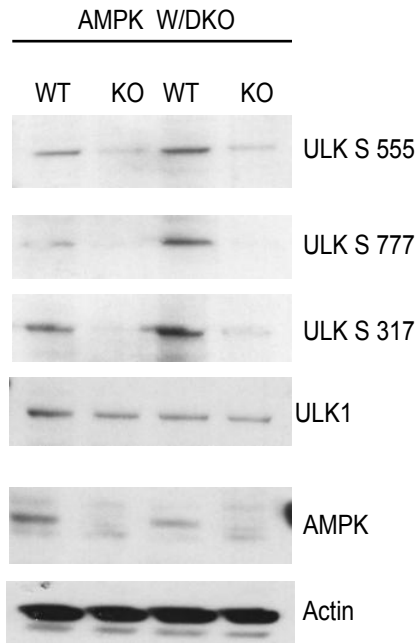

B

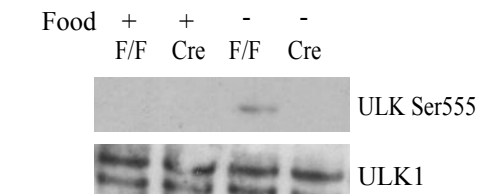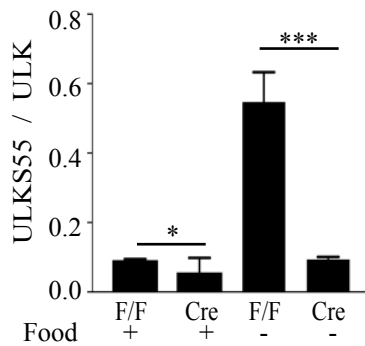

**Figure S3. IPMK regulates autophagy through ULK phosphorylation, Related to Figure 3.**

(A) Immunoblot of ULK ser 555, 777, 317 from AMPK double knock (alpha 1/2) out MEFs. (B) Immunoblot of ULK ser 555 in Flox/Flox and IPMK KO (AlbCre) mice liver after 24 h food deprivation.

Figure S 4

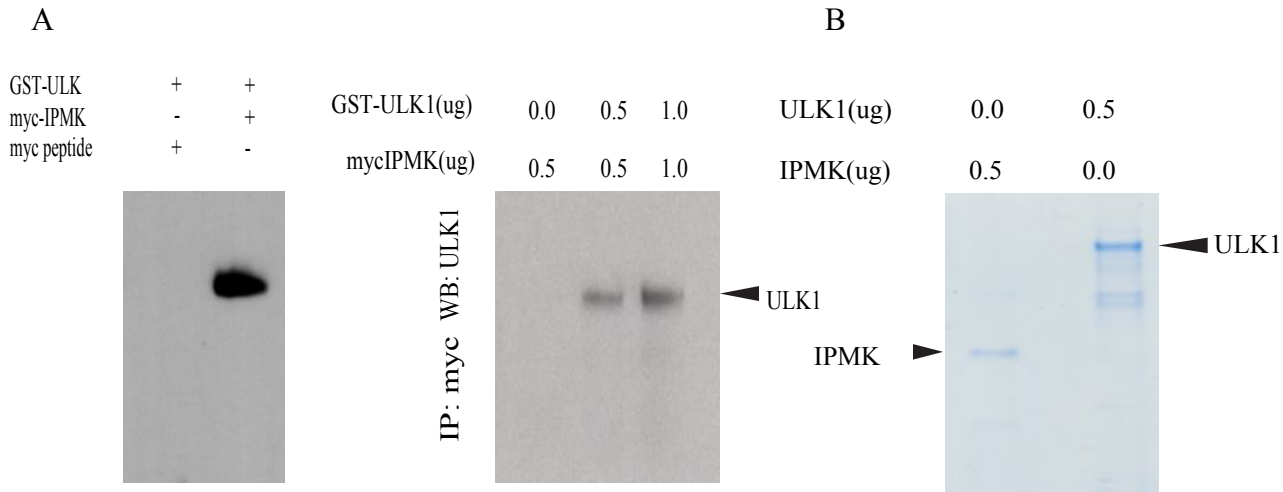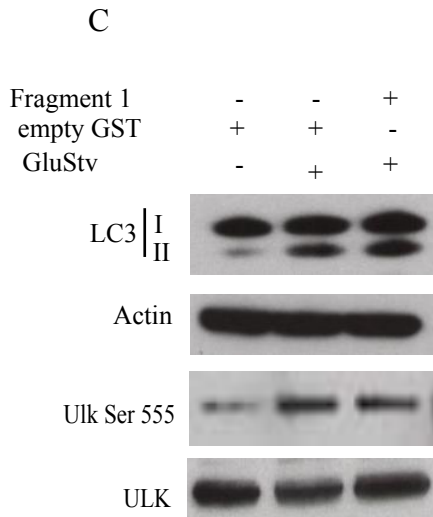



**Figure S4. IPMK interacts with ULK1, Related to Figure 4.**

(A) Recombinant mycIPMK was incubated with recombinant ULK1. Myc IPMK was immunoprecipitated and western blot performed for ULK1. (B) Validation of purity of recombinant protein in NuPAGE gel electrophoresis. (C) Fragment 1 of IPMK was transiently transfected in HEK293 cells followed by glucose starvation to analyze effects of fragment 1 on LC3II and ULK Ser 555.

Figure S 5

A

|             |   |   |              |     |      |     |     |
|-------------|---|---|--------------|-----|------|-----|-----|
| His-AMPK    | + | + | His-AMPK(ug) | 0.0 | 0.25 | 0.5 | 1.0 |
| myc-IPMK    | - | + | myc-IPMK(ug) | 0.0 | 0.25 | 0.5 | 1.0 |
| myc peptide | + | - |              |     |      |     |     |

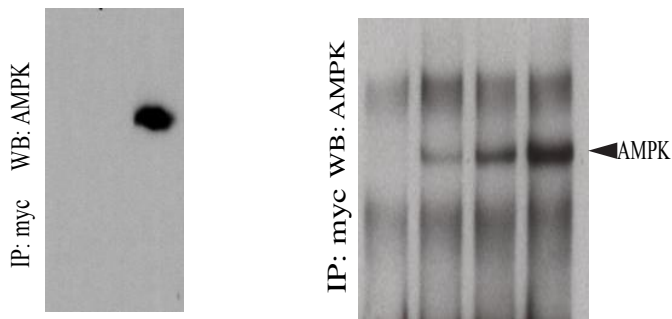

B

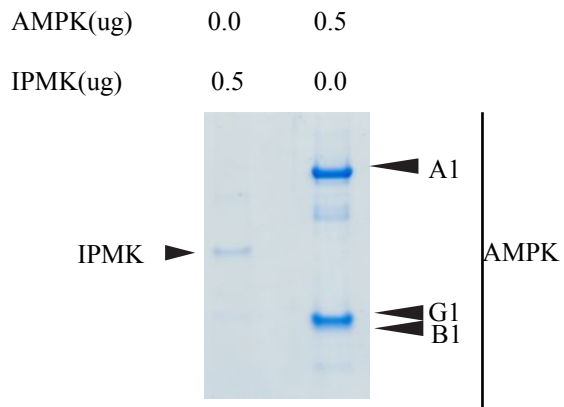

C

|            |   |   |   |
|------------|---|---|---|
| Fragment 5 | - | - | + |
| empty GST  | + | + | - |
| GluStv     | - | + | + |

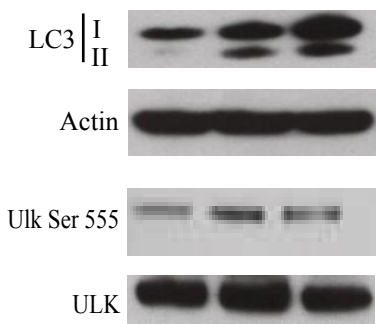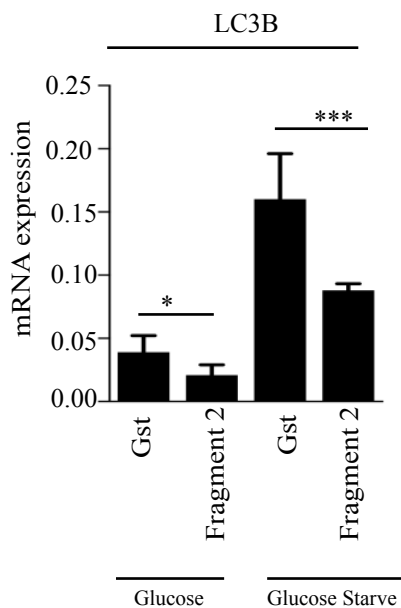

**Figure S5.**

**IPMK interacts with AMPK, Related to Figure 5.**

(A) Recombinant mycIPMK was incubated with recombinant AMPK. Myc-IPMK was immunoprecipitated, and samples were western blotted for AMPK. (B) Validation of purity of recombinant protein in NuPAGE gel electrophoresis. (C) Fragment 5 of IPMK was transiently transfected in HEK293 cells followed by glucose starvation to analyze effects of fragment 1 on LC3II and ULK Ser 555. (D) Transcription of LC3B mRNA.  $p < 0.05$  \*,  $p < 0.001$  \*\*\* . Data are means  $\pm$  SD.

Figure S 6

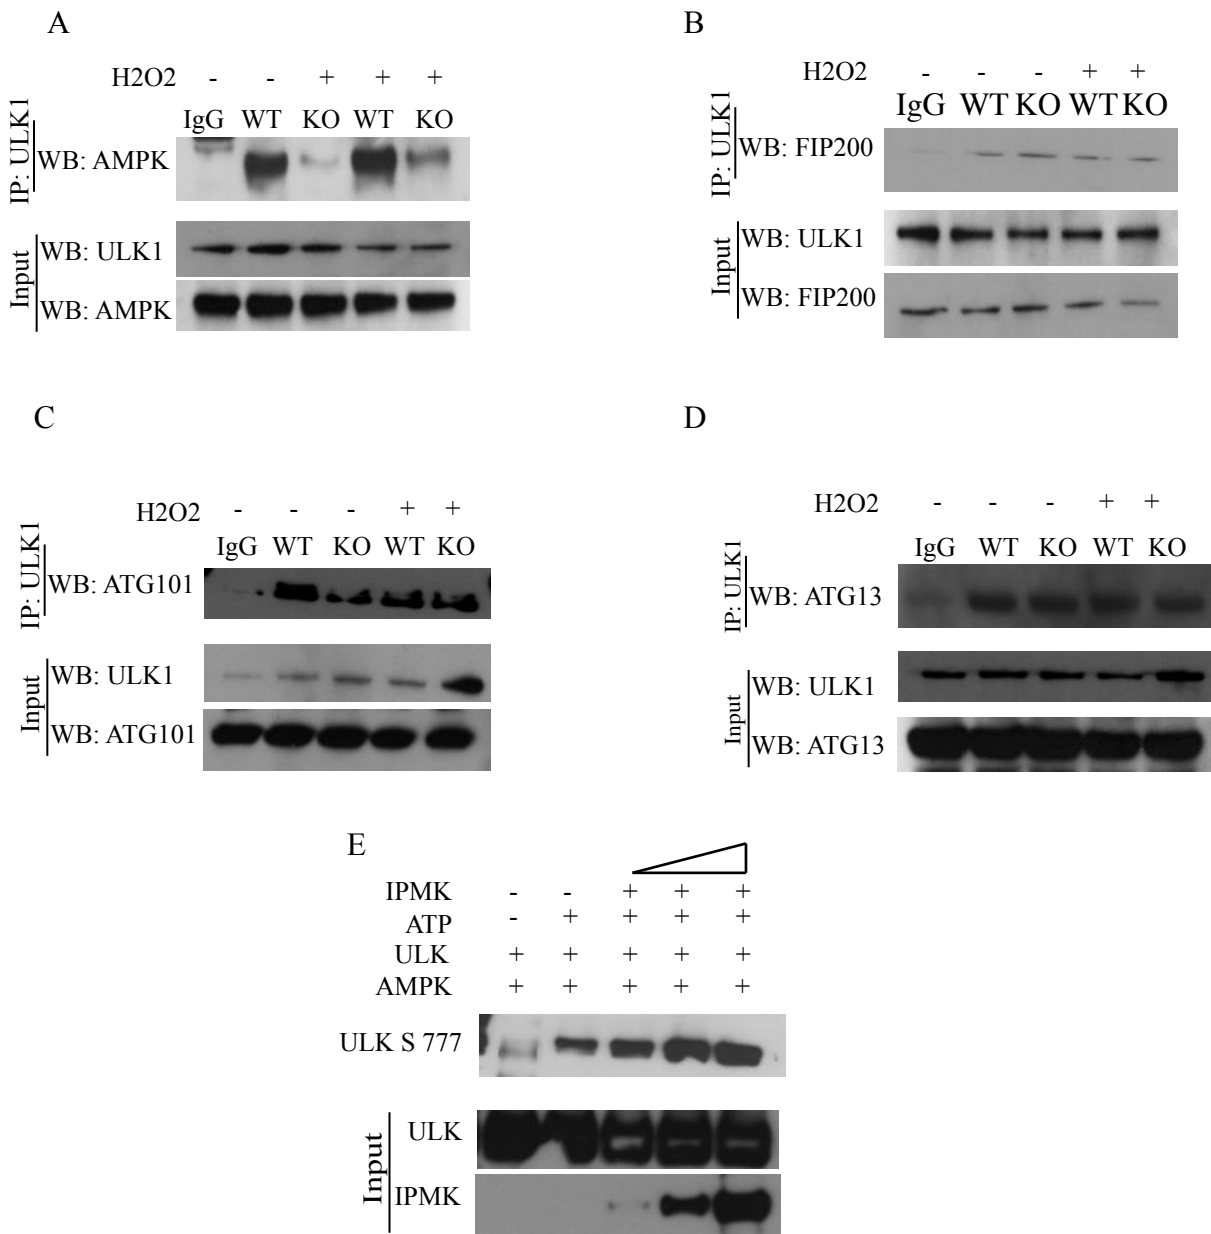

**Figure S6.**

**IPMK is essential for AMPK/ULK1 interactions, Related to Figure 6.**

(A) IPMK wild type and KO MEFs were treated with H<sub>2</sub>O<sub>2</sub> (500  $\mu$  M). The role of IPMK as a scaffold was analyzed by immunoprecipitation of endogenous ULK1 and western blot of endogenous AMPK, (B) FIP200, (C) ATG101, (D) ATG13. In vitro AMPK dependent ULK phosphorylation, in presence of increasing amounts (100ng, 500ng, 1 $\mu$ g) of recombinant human IPMK (E).

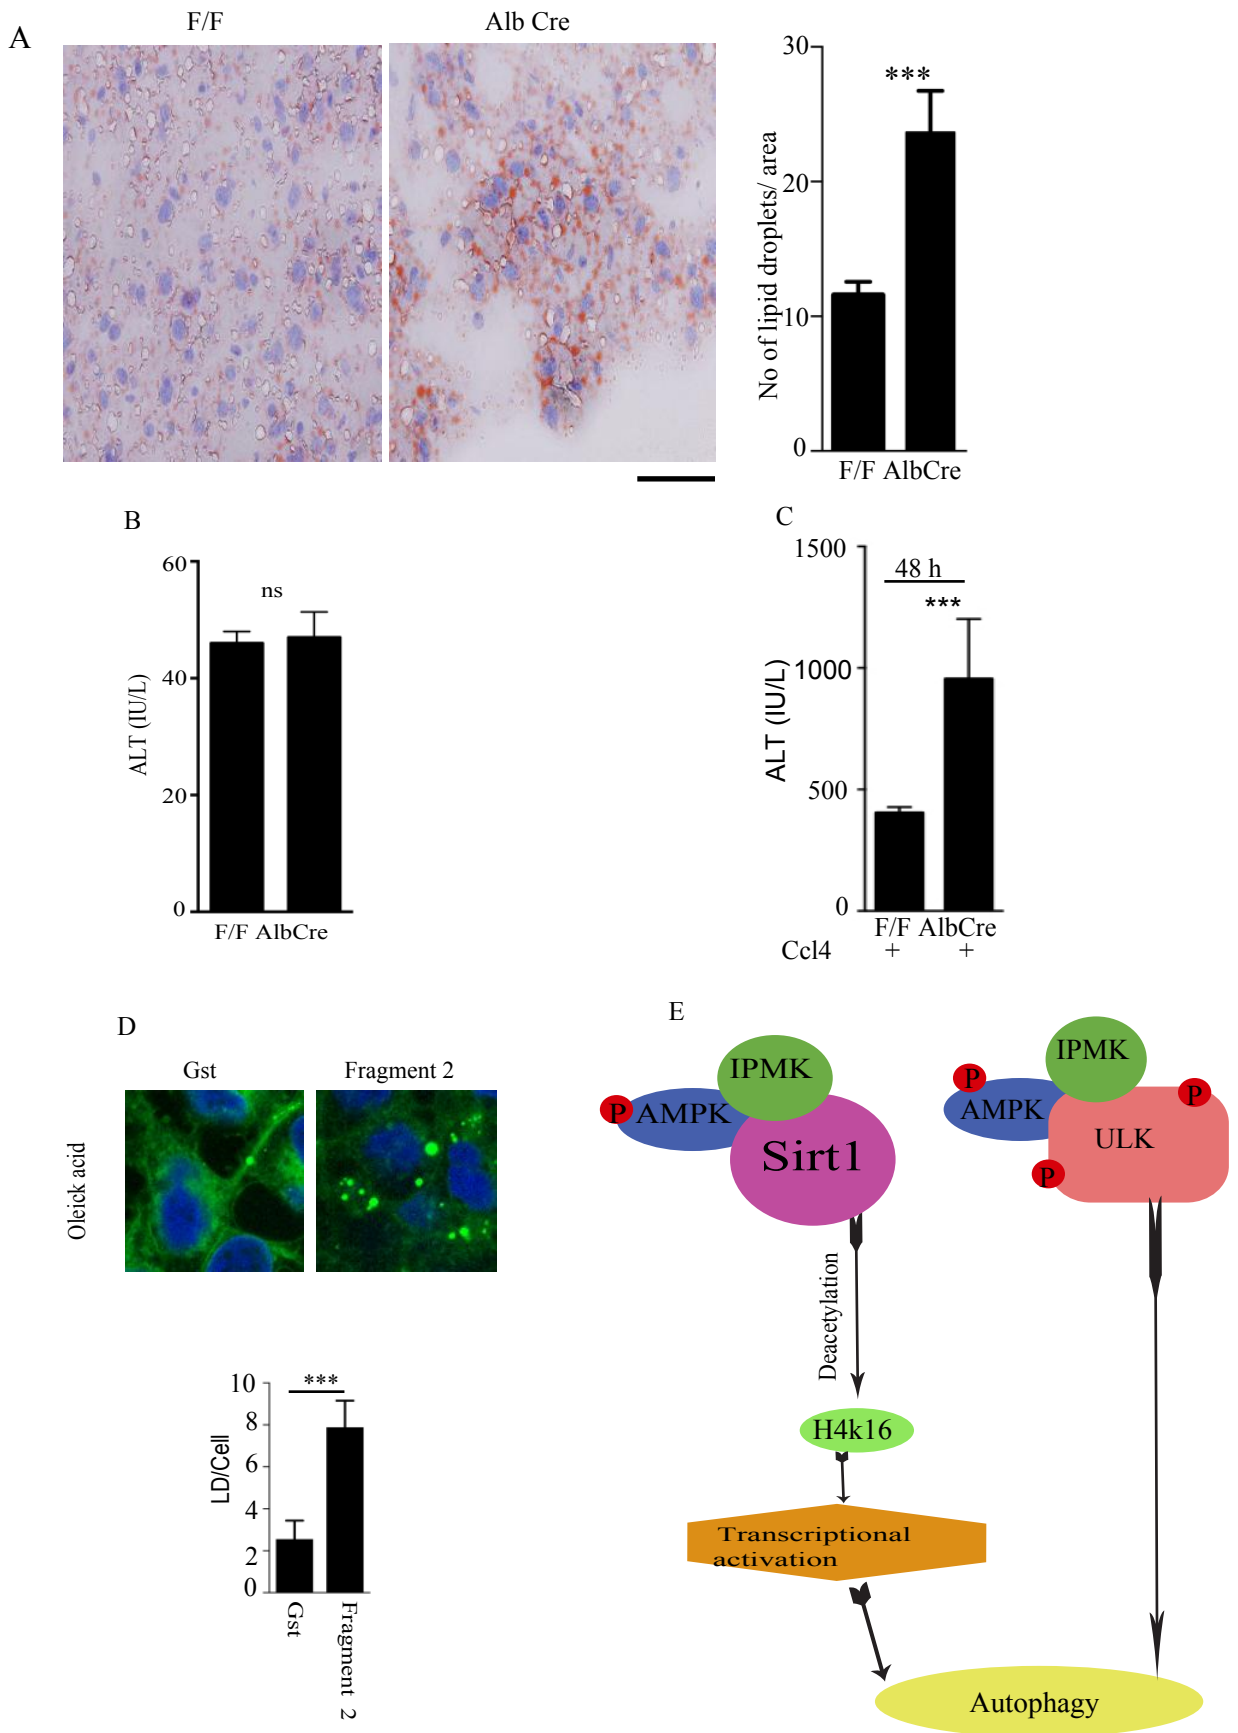

**Figure S7. IPMK is required for lipophagy and cytoprotection , Related to Figure 7.**

(A) IPMK F/F and Alb (Cre) mice were starved for 24h and the livers harvested for Oil red O (ORO) staining to quantitate accumulated lipid droplets. Numbers of lipid droplets were counted and represented as bars. (n=3),  $p < 0.001$  \*\*\*. Data are means  $\pm$  SD. Scale bar 200 $\mu$ M (B) Serum ALT level in untreated mice, (n=5), Data are means  $\pm$  SD. (C) Serum ALT level in Ccl4 treated mice, (n=5),  $p < 0.001$  \*\*\*; Data are means  $\pm$  SD. (D) Lipid droplet counts in HEK 293 cells after fragment 2 over expression. (E) Schematic diagram of IPMK mediated autophagy induction. IPMK interacts with target proteins to form signaling complexes. IPMK-AMPK-Sirt1 signaling axis enhances AMPK activation followed by Sirt1 dependent deacetylation of H4K16ac resulting in transcriptional activation of autophagy related genes. In the IPMK-AMPK-ULK signaling axis, IPMK forms a ternary complex and promotes AMPK dependent ULK phosphorylation leading to activation of autophagy.
