# Supplementary material for: IPMK Mediates Activation of ULK Signaling and Transcriptional Regulation of Autophagy Linked to Liver Inflammation and Regeneration
Source: PubMed Central journal article supplement (PMC6494083; doi:10.1016/j.celrep.2019.02.013), 2019-03-05
Supplement: NIHMS1523265-supplement-2.pdf [file NIHMS1523265-supplement-2.pdf]

## IPMK Mediates Activation of ULK Signaling and Transcriptional Regulation of Autophagy Linked to Liver Inflammation and Regeneration

### Graphical Abstract

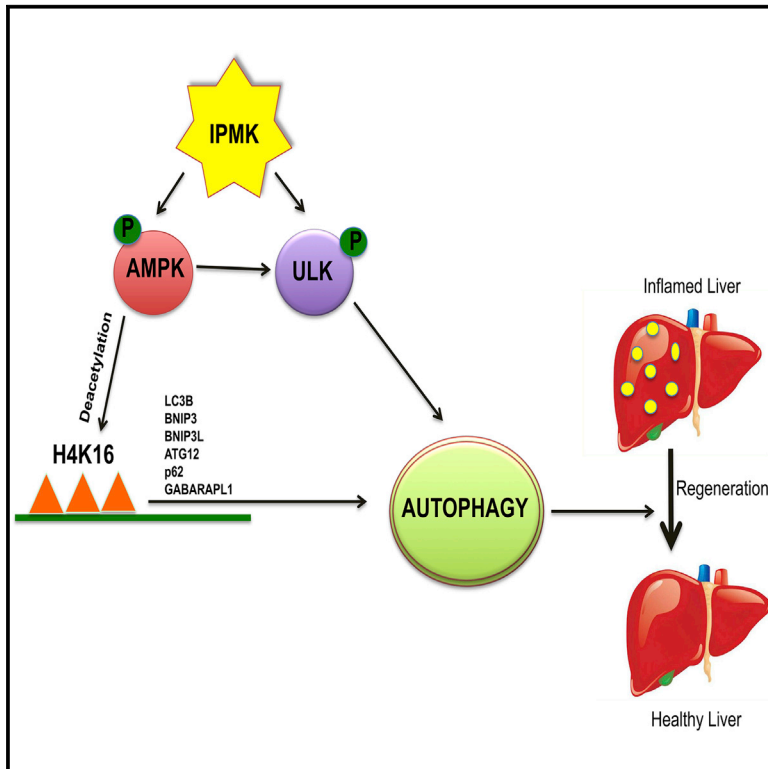

### Authors

Prasun Guha, Richa Tyagi, Sayan Chowdhury, ..., Risheng Xu, Adam C. Resnick, Solomon H. Snyder

### Correspondence

ssnyder@jhmi.edu

### In Brief

IPMK is a physiological determinant of autophagy and is critical in liver inflammation. Two signaling axes, IPMK-AMPK-Sirt-1 and IPMK-AMPK-ULK1, appear to mediate the influence of IPMK on autophagy. Deletion of IPMK impairs lipophagy and hepatocyte regeneration.

### Highlights

- IPMK is a physiological determinant of autophagy and critical for liver inflammation
- IPMK-AMPK-Sirt-1 and IPMK-AMPK-ULK1 mediate the influence of IPMK on autophagy
- Deletion of IPMK impairs lipophagy and hepatocyte regeneration

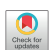

# IPMK Mediates Activation of ULK Signaling and Transcriptional Regulation of Autophagy Linked to Liver Inflammation and Regeneration

Prasun Guha,<sup>1</sup> Richa Tyagi,<sup>1</sup> Sayan Chowdhury,<sup>1</sup> Luke Reilly,<sup>1</sup> Chenglai Fu,<sup>1</sup> Risheng Xu,<sup>1</sup> Adam C. Resnick,<sup>4</sup> and Solomon H. Snyder<sup>1,2,3,5,\*</sup>

<sup>1</sup>The Solomon H. Snyder Department of Neuroscience, Johns Hopkins University School of Medicine, Baltimore, MD 21205, USA

<sup>2</sup>Department of Psychiatry and Behavioral Sciences, Johns Hopkins University School of Medicine, Baltimore, MD 21205, USA

<sup>3</sup>Department of Pharmacology and Molecular Sciences, Johns Hopkins University School of Medicine, Baltimore, MD 21205, USA

<sup>4</sup>Children's Hospital of Philadelphia, Colket Translational Research Building, 3501 Civic Center Blvd., Philadelphia, PA 19104-4399, USA

<sup>5</sup>Lead Contact

\*Correspondence: [ssnyder@jhmi.edu](mailto:ssnyder@jhmi.edu)

<https://doi.org/10.1016/j.celrep.2019.02.013>

## SUMMARY

Autophagy plays a broad role in health and disease. Here, we show that inositol polyphosphate multikinase (IPMK) is a prominent physiological determinant of autophagy and is critical for liver inflammation and regeneration. Deletion of IPMK diminishes autophagy in cell lines and mouse liver. Regulation of autophagy by IPMK does not require catalytic activity. Two signaling axes, IPMK-AMPK-Sirt-1 and IPMK-AMPK-ULK1, appear to mediate the influence of IPMK on autophagy. IPMK enhances autophagy-related transcription by stimulating AMPK-dependent Sirt-1 activation, which mediates the deacetylation of histone 4 lysine 16. Furthermore, direct binding of IPMK to ULK and AMPK forms a ternary complex that facilitates AMPK-dependent ULK phosphorylation. Deletion of IPMK in cell lines and intact mice virtually abolishes lipophagy, promotes liver damage as well as inflammation, and impairs hepatocyte regeneration. Thus, targeting IPMK may afford therapeutic benefits in disabilities that depend on autophagy and lipophagy—specifically, in liver inflammation and regeneration.

## INTRODUCTION

Autophagy occurs at a basal rate in most cells, eliminating protein aggregates and damaged organelles to maintain cytoplasmic homeostasis. Autophagy can also lead to cell death (Guha et al., 2016) and plays a role in neurodegenerative diseases as well as malignant transformation (Kaur and Debnath, 2015; Galluzzi et al., 2016). Diverse families of genes regulating the autophagic process have been delineated, but how autophagy affects their signaling remains unclear.

Inositol polyphosphates are major signaling molecules generated by a family of inositol phosphate kinases that successively phosphorylate the inositol ring, leading to the formation of

inositol hexakisphosphate (IP6) as well as lesser phosphorylated derivatives. IP6, in turn, is phosphorylated to generate inositol pyrophosphates; specifically, one or two isomers of IP7 and IP8 (Maag et al., 2011). Inositol polyphosphate multikinase (IPMK) physiologically generates IP4 and IP5 (Maag et al., 2011). In a non-catalytic fashion, IPMK influences diverse cellular processes, functioning as a co-activator for p53, CREB, p300 (CBP), and serum response factor (SRF) and regulating immediate-early gene transcription (Kim et al., 2011a, 2013; Xu et al., 2013). As one of its kinase-independent activities, IPMK stabilizes the mTORC1 complex (Kim et al., 2011a). IPMK is also a physiological phosphatidylinositol 3-kinase (PI3K), with activity that leads to Akt phosphorylation (Maag et al., 2011). Deletion of IPMK is embryonic lethal in mice, indicating the importance of this enzyme in biology (Maag et al., 2011).

Interactions between IPMK and autophagy have been reported. In yeast, deletion of IPMK leads to virtual abolition of autophagy as well as mitophagy (Taylor et al., 2012). IPMK appears to regulate autophagy genes as well as their link to ULK kinase. Thus, deletion of IPMK markedly reduces transcription of autophagy-associated genes and decreases activation of ULK as well as downstream autophagy signaling. In the present study, we delineate mechanisms whereby IPMK mediates diverse components of autophagy, for which IPMK appears to be a major physiological determinant.

## RESULT

### IPMK Is Essential for Autophagy

To investigate the roles of IPMK in autophagy, we generated immortalized IPMK wild-type (WT)/knockout (KO) MEFs (mouse embryonic fibroblasts) (Maag et al., 2011). IPMK KO MEFs displayed impaired spreading, a well-established feature of autophagy suppression (Sharifi et al., 2016; Figure S1A). We monitored autophagy by quantifying LC3 puncta, which correspond to autophagic vesicles (Klionsky et al., 2016). WT and KO MEFs stably expressing GFP-LC3 were exposed to bafilomycin A1 (Baf A1) to analyze basal autophagic flux (Klionsky et al., 2016), which was markedly diminished in KO MEFs (Figure 1A). Glucose starvation, employed as a stimulus for autophagy,

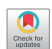

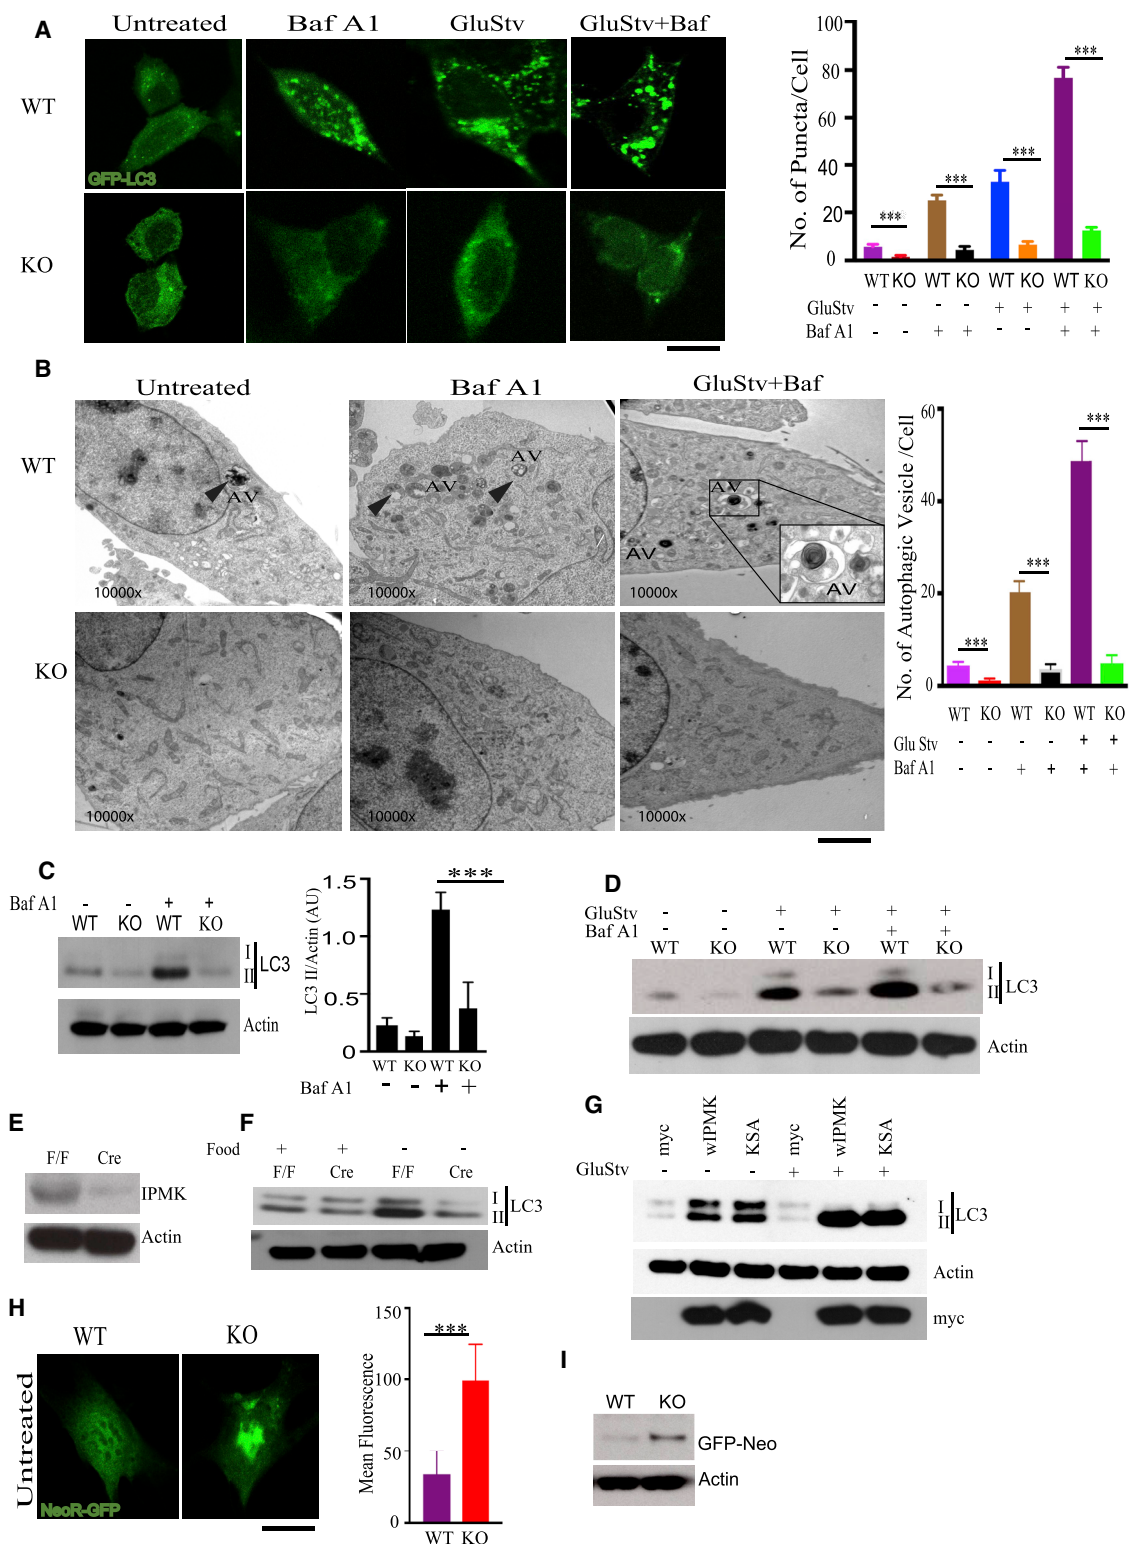

significantly enhanced autophagic flux, with the increase reduced about 70% in IPMK KO MEFs (Figure 1A).

We validated the confocal data using transmission electron microscopy (TEM) (Klionsky et al., 2016). Under basal conditions, IPMK KO MEFs experienced an almost 70% loss of double-membrane autophagic vesicles. Glucose starvation markedly enhanced the numbers of autophagosomes in WT MEFs, which were greatly diminished in KO preparations (Figure 1B).

Global IPMK deletion in mice is embryonic lethal (Maag et al., 2011). Accordingly, we created liver-specific conditional KOs of IPMK by crossing flox/flox IPMK mice with albumin-Cre (alb-Cre) mice (STAR Methods; Figure S1B). Electron microscopy analysis of 24-h-starved mouse liver tissue sections revealed autophagic vesicle formation in IPMK floxed/floxed (F/F) (WT) liver, which was markedly diminished in IPMK F/F-AlbCre liver (KO) (Figure S1C), confirming the role of IPMK in regulation of autophagy.

Phosphatidylethanol-conjugated ATG8/LC3 is a widely used biochemical marker of autophagy (Sharifi et al., 2016). LC3-I is non-lipidated, whereas LC3-II is the lipidated form. Levels of LC3-II are employed as markers of autophagosome formation and accumulation (Klionsky et al., 2016). To evaluate basal autophagic flux, cells were treated with Baf A1. Deletion of IPMK virtually abolished LC3-II levels, implying a major role of IPMK in determining basal levels of autophagy (Figure 1C). We also stimulated autophagy through glucose starvation for 8 h. Deletion of IPMK markedly suppressed LC3 lipidation in glucose-starved MEFs (Figure 1D). We employed 24 h of food deprivation, a process that induced robust LC3-II expression in the livers of F/F mice (IPMK F/F). In contrast, IPMK-deleted KO mice (IPMK F/F-AlbCre) failed to express LC3-II (Figures 1E and 1F).

To ensure that the findings with glucose starvation can be generalized to other autophagic stimuli, we evaluated H<sub>2</sub>O<sub>2</sub> treatment, which is well-known to elicit autophagy (He et al., 2017). IPMK deletion abolished LC3-II enhancement associated with H<sub>2</sub>O<sub>2</sub> treatment (Figure S1D).

We extended our findings to a different cell type. Using small hairpin RNA (shRNA), we stably knocked down IPMK in 786-0 renal cancer cells (Figure S1E). Knockdown of IPMK with shRNA clone 3 in 786-0 cells significantly reduced enhancement of LC3-II levels by glucose starvation (Figure S1F).

IPMK possesses distinct inositol phosphate kinase activity and PI3K activity (Figure S1G; Maag et al., 2011). To ascertain the importance of IPMK's catalytic activity in regulating autophagy, we overexpressed IPMK WT or IPMK-KSA (IPMK

K129A/S235A), which is kinase-dead (devoid of inositol triphosphate [IP<sub>3</sub>] and phosphatidylinositol 3-phosphate [PIP<sub>3</sub>] kinase activity) and verified their enzymatic activity through inositol profiling (Figure S1H). We attempted to reverse the decreased autophagy associated with IPMK deletion by rescuing IPMK KO MEFs with WT or kinase-dead IPMK mutants (Figure 1G). Kinase-dead IPMK mutants rescued the loss of LC3-II in IPMK KO cells as effectively as IPMK WT (Figure 1G). Thus, the catalytic activity of IPMK is not required for its enhancement of autophagy.

Removal of exclusive autophagic substrates (not proteasomal substrates) provides an independent way to analyze autophagy. Neomycinphosphotransferase II (NeoR) is an exclusive autophagic substrate (Nimmerjahn et al., 2003; Chauhan et al., 2013; Yang et al., 2011). As established earlier, NeoR-GFP degradation is completely inhibited by autophagic inhibitors like 3-methyladenine (3-MA) but does not respond to inhibitors of proteasomal degradation. Inhibition of autophagy leads to accumulation of NeoR-GFP, resulting in enhanced GFP fluorescence (Nimmerjahn et al., 2003; Chauhan et al., 2013; Yang et al., 2011). We transfected WT and KO MEFs with NeoR-GFP plasmids, and 24 h after transfection we analyzed sequestration of NeoR-GFP using confocal imaging and western blotting. Under basal conditions, WT MEFs displayed uniform cytoplasmic and nuclear fluorescence. However, in KO cells, brightly fluorescent protein aggregates were evident in nuclear proximal regions, with a greatly enhanced mean fluorescence intensity (Figure 1H). Western blots showed stronger NeoR-GFP bands in KO than in WT cells (Figure 1I), implying defects in basal autophagy.

### Deletion of IPMK Profoundly Suppresses Transcription of Autophagy-Related Genes by Deactivating Sirtuin 1

We showed previously that IPMK can function as a transcriptional co-activator and control transcription of immediate-early genes (Xu et al., 2013). IPMK has also been found to control the transcriptional activity of HDAC (Watson et al., 2012; Bosch and Saiardi, 2012). Arg82, the yeast homolog of IPMK, controls transcription of a set of genes important for arginine metabolism (Bosch and Saiardi, 2012).

To analyze IPMK's role as a transcriptional regulator, we performed qPCR of 6 autophagy-related genes. We selected LC3B and GABARAPL1, which facilitate elongation and closure of autophagic vesicles (Joachim et al., 2015; Slobodkin and Elazar, 2013); BNIP3 and BNIP3L, which help initiate macro-autophagy

(B) Transmission electron microscopy (TEM) of WT and KO MEFs subjected to different treatments. AV, autophagic vacuole. Scale bar, 2  $\mu$ M. Autophagic vacuoles per cell are shown as bar diagrams.

(C) The basal level of autophagy was evaluated by western blotting LC3 with Baf A1 (100 nM). The bar chart depicts the densitometric relative value of LC3-II and Actin.  $n = 3$ , \*\*\* $p < 0.001$ .

(D) LC3 western blot to check autophagic flux under GluStv and GluStv + Baf A1.

(E) Western blot of the IPMK level in F/F and IPMK-deleted (Cre) livers.

(F) LC3 western blot in F/F and Cre (IPMK KO) livers and after 24 h of food starvation.

(G) IPMK KO MEFs were stably transfected with empty vector (myc), IPMK WT (wIPMK) myc, and kinase-dead myc (KSA) IPMK. Autophagy was evaluated by western blotting LC3 II levels with and without GluStv. Baf A1 (100 nM) was used to analyze autophagic flux.

(H) NeoR-GFP was transiently transfected in WT and KO MEFs. Twenty-four hours after transfection, cells were analyzed using confocal microscopy. Scale bar, 20  $\mu$ M. The bar chart depicts the mean fluorescence level of GFP.

(I) The amount of NeoR-GFP was analyzed by western blotting NeoR-GFP in WT and KO MEF. Data are means  $\pm$  SD.

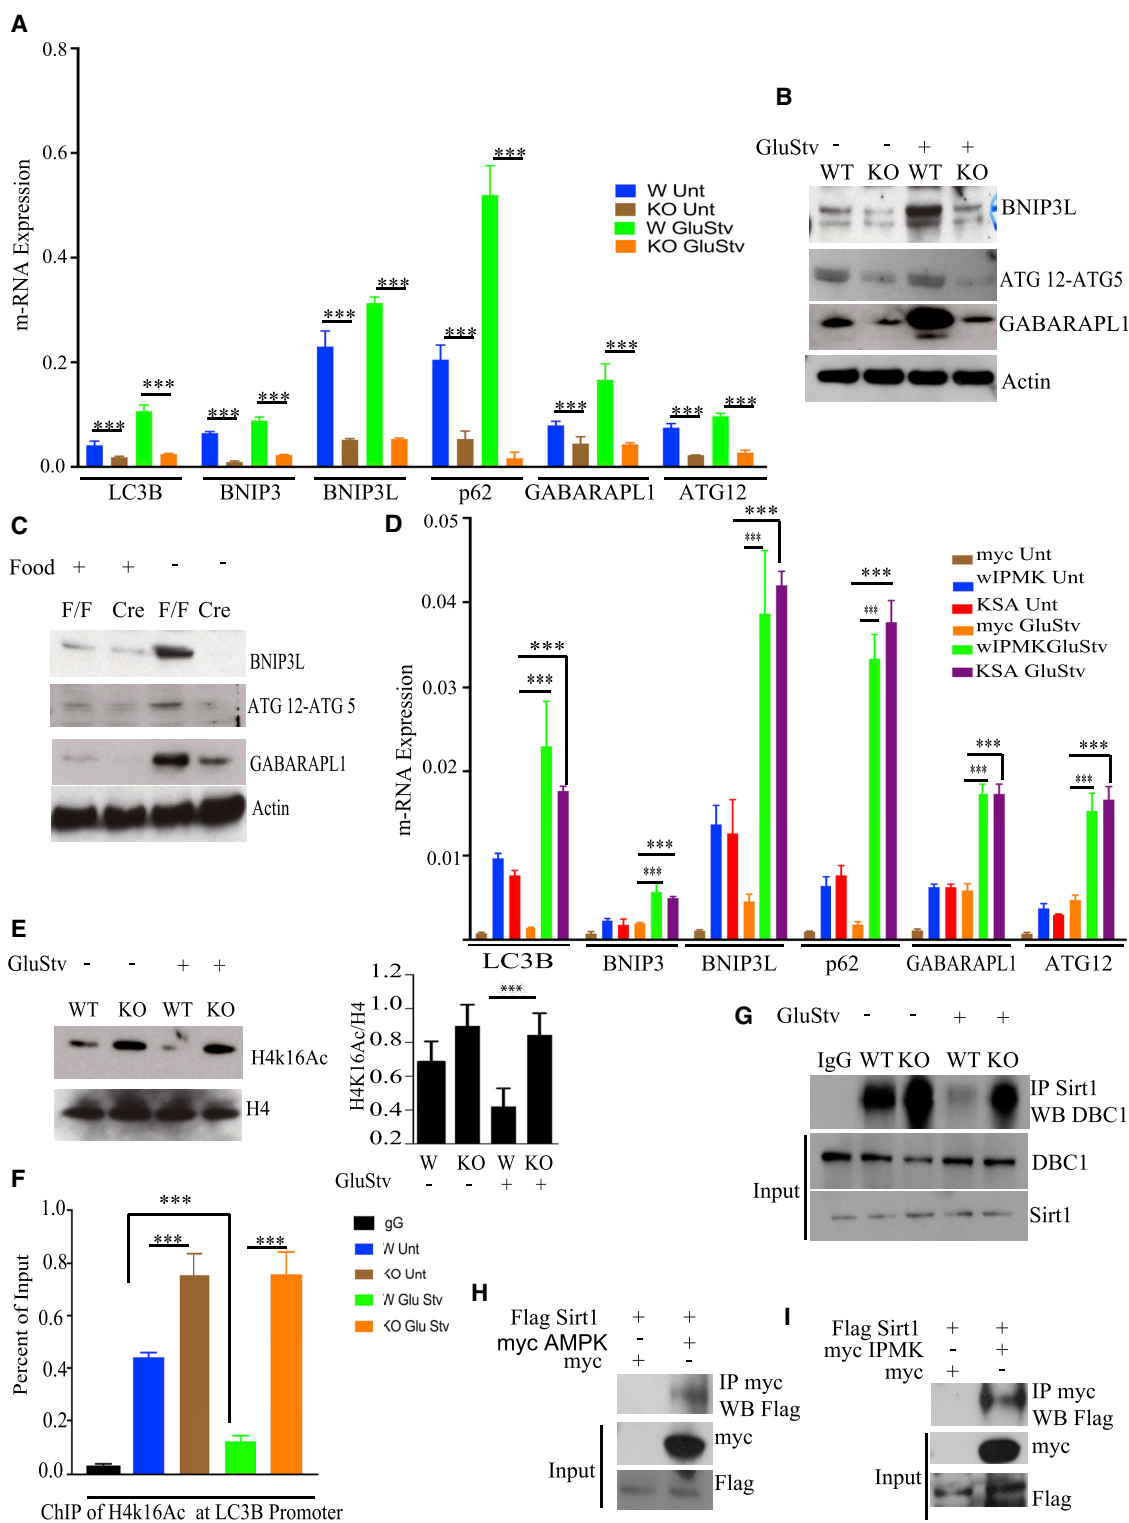

**Figure 2. IPMK Enhances Transcription of Autophagy-Related Genes**

(A) qPCR analysis of LC3B, BNIP3, BNIP3L, p62, GABARAPL1, and ATG12 in IPMK WT and KO MEFs after GluStv.

(B) Western blot of BNIP3L, ATG12, and GABARAPL1 in IPMK WT and KO MEFs after GluStv.

(C) Western blot of BNIP3L, ATG12, and GABARAPL1 in F/F and Cre (IPMK KO) mouse livers after 24 h of food starvation.

(legend continued on next page)



and selective forms of autophagy, such as mitophagy (Zhang and Ney, 2009; Quinsay et al., 2010); ATG12, a ubiquitin-like protein involved in autophagic vesicle formation (Fader and Colombo, 2009); and P62 (sqstm1), an adaptor protein that recruits cargo to autophagic vesicles (Kaur and Debnath, 2015). Deletion of IPMK in MEFs markedly impaired mRNA expression of these genes in untreated preparations and under glucose starvation (Figure 2A). Furthermore, we performed western blotting of BNIP3L, ATG12-ATG5, and GABARAPL1 to confirm the qPCR data. The protein levels of the above genes were induced by glucose starvation and virtually abolished in IPMK KO MEFs (Figure 2B).

We extended our findings to 786-0 cells, in which deletion of IPMK markedly reduced the protein levels of BNIP3L, ATG12, and GABARAPL1 (Figure S2A). *In vivo*, western blot analysis of mouse liver samples after 24 h of food starvation showed significant increases in BNIP3L, ATG12-ATG5, and GABARAPL1 in IPMK F/F mice; they were markedly diminished in IPMK F/F-AlbCre mice (KO) (Figure 2C). We also examined MEFs treated with H<sub>2</sub>O<sub>2</sub>. Within 1 h of H<sub>2</sub>O<sub>2</sub> exposure, we observed a substantial increase in the mRNA levels of LC3B, BNIP3, BNIP3L, p62, GABARAPL1, and ATG12; they were markedly decreased in IPMK KO MEFs (Figure S2B).

The decreased mRNA expression of LC3B, BNIP3, BNIP3L, p62, GABARAPL1, and ATG12 was rescued by both the WT and kinase-dead forms of IPMK (Figure 2D). Thus, the regulation of transcription of autophagy-related genes by IPMK is independent of its kinase activity.

IPMK can regulate both histone acetylation and deacetylation, depending on specific stimuli (Watson et al., 2012; Xu et al., 2013). Induction of autophagy requires downregulation of histone H4 lysine 16 acetylation (H4k16ac) (Fullgrabe et al., 2013; Sakamaki et al., 2017). To ascertain whether IPMK regulates autophagy through deacetylation of h4K16, we monitored the levels of H4k16ac. Glucose starvation in WT cells markedly downregulated H4k16ac, whereas deletion of IPMK completely suppressed deacetylation of h4K16 (Figure 2E). Further, chromatin immunoprecipitation (ChIP) analysis of H4k16ac at the LC3B promoter confirmed starvation-induced loss of h4K16 acetylation in WT cells, with KO levels virtually unchanged (Figure 2F).

Sirtuin 1 (Sirt-1) is an important h4K16 deacetylase that regulates starvation-induced autophagy (Sakamaki and Ryan, 2017; Sakamaki et al., 2017; Berger and Sassone-Corsi, 2016). Sirt-1 is activated by nutrient deprivation via its dissociation from its inhibitory binding partner Deleted in Breast Cancer Protein 1 (DBC1) (Kim et al., 2008). AMP-activated protein kinase (AMPK), a kinase activated by nutrient starvation (Kim et al., 2011b), stimulates Sirt-1 activation by dissociating DBC1 from

Sirt-1 (Sakamaki et al., 2017). AMPK phosphorylation at Thr172, which is required for its activation and is markedly increased in nutrient and food starvation (Bang et al., 2014), was significantly diminished in IPMK KO cells (MEFs) and liver tissue (Figure S2C). Treatment with 5-aminoimidazole-4-carboxamide ribonucleotide (AICAR), a cell-permeable AMPK stimulant, enhanced AMPK phosphorylation in WT MEFs but strikingly less in IPMK KO MEFs (Figure S2C). Co-immunoprecipitation of Sirt-1/DBC1 revealed binding of both proteins in WT and KO MEFs under basal conditions. Glucose starvation in WT cells abolished Sirt-1/DBC1 binding, whereas, in KO cells, binding was unchanged (Figure 2G).

We wanted to know whether AMPK could physically interact with Sirt-1. Overexpressed AMPK can bind to overexpressed Sirt-1 (Figure 2H). Intriguingly, endogenous AMPK could bind to endogenous Sirt-1 independent of glucose starvation (Figure S2D). Deletion of IPMK diminished the endogenous Sirt-1/AMPK interaction (Figure S2D). Overexpressed IPMK also immunoprecipitated overexpressed and endogenous Sirt-1 in HEK293 cells (Figure 2I; Figure S2E).

Collectively, the data above detail a signaling cascade whereby IPMK helps to activate AMPK, and binding of IPMK and AMPK to Sirt 1 facilitates dissociation of Sirt-1 from DBC1, stimulating Sirt-1 activation. Activated Sirt-1 further enhances deacetylation of H4K16 and transcription of autophagy-related genes (Figure S2F).

### IPMK Mediates AMPK-Dependent ULK Phosphorylation

AMPK may also influence autophagy through ULK phosphorylation. ULK (Unc-51-like autophagy-activating kinase) is one of the earliest mediators of autophagy (Itakura and Mizushima, 2010). Kim et al. (2011b) and Egan et al. (2011) provided evidence that AMPK and the mechanistic target of rapamycin (mTOR) regulate initiation of autophagy by phosphorylating ULK. mTOR inhibits ULK activity by phosphorylating the enzyme at serine 757. Under conditions of nutrient stress, AMPK enhances autophagy by phosphorylating raptor, thereby inhibiting mTORC1 and activating phosphorylation of ULK at serines 555, 317, and 777. We agree with the previous finding because deletion of AMPK (alpha 1/2) (double KO [DKO]) impaired ULK phosphorylation at serines 555, 317, and 777 (Figure S3A). Because IPMK regulates AMPK activation, we explored the influence of IPMK on phosphorylation of ULK at the AMPK sites S-555/317/777 (Figure 3A). IPMK deletion abolished AMPK-associated phosphorylation of ULK at S-555/317/777 under glucose starvation.

Because IPMK deletion abolished the activating phosphorylation events on ULK, one might anticipate decreases in ULK-dependent phosphorylation with IPMK deficit.

(D) IPMK KO MEFs were stably transfected with empty vector (myc), wIPMK myc, and kinase-dead myc (KSA) IPMK. Shown is a qPCR analysis of LC3B, BNIP3, BNIP3L, p62, GABARAPL1, and ATG12 in myc, wIPMK, and KSA MEFs.

(E) Western blot analysis of histone 4 lysine 16 acetylation (H4k16ac).

(F) Chromatin immunoprecipitation of H4k16 at the LC3B promoter from WT and KO MEFs. n = 3, \*\*\*p < 0.001.

(G) Immunoprecipitation of Sirt-1 and western blot of DBC1 before and after GluStv in WT and KO MEFs.

(H) HEK293 cells were transfected with FLAG Sirt-1 and myc AMPK or empty vector of myc. Immunoprecipitation of myc was followed by FLAG western blotting.

(I) HEK293 cells were transfected with FLAG Sirt-1 and myc IPMK and empty vector of myc. Immunoprecipitation of myc was followed by FLAG western blotting. Data are means ± SD.

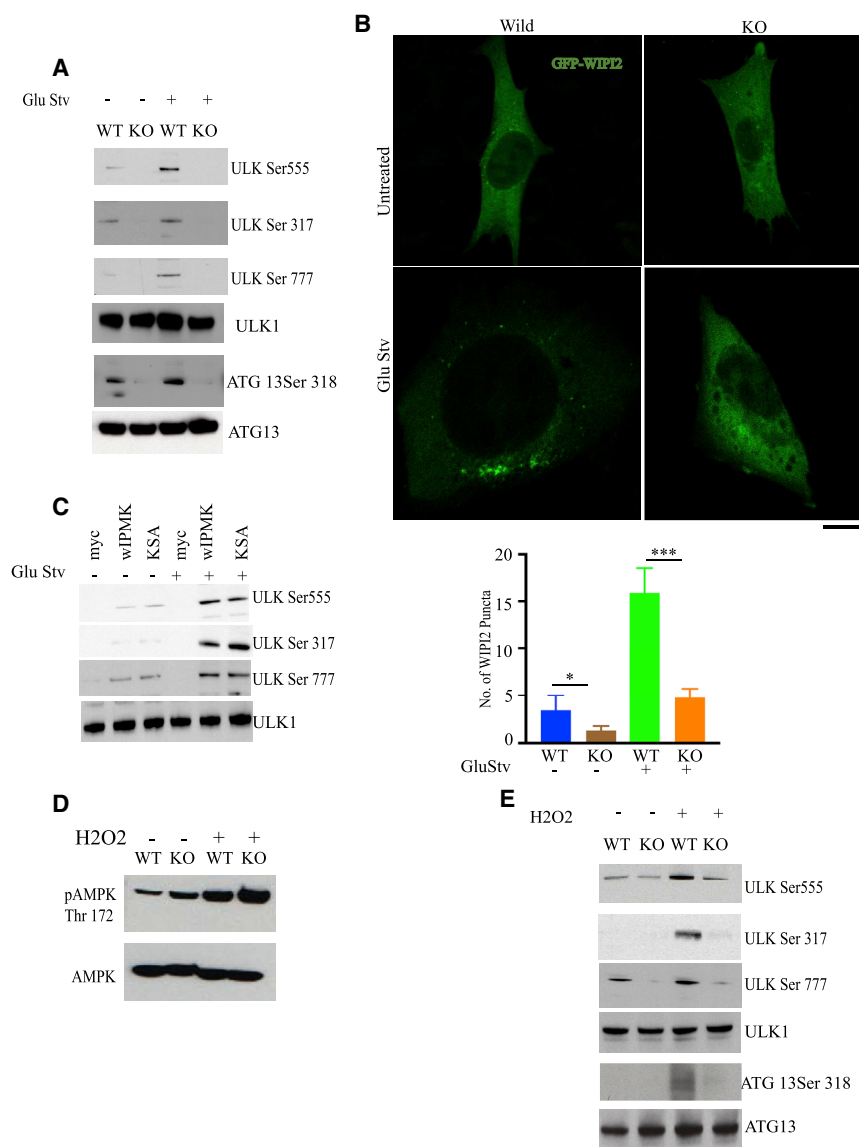

**Figure 3. IPMK Regulates Autophagy through ULK Phosphorylation**

(A) IPMK WT and KO MEFs were subjected to GluStv, followed by immunoblotting of phosphorylated ULK1 at serines 555, 317, and 777. The ATG 13 phosphorylation status indicates the ULK1 activation level.

(B) IPMK WT and KO MEFs were transiently transfected with GFP-WIP12. Confocal analysis of WIP12 puncta in WT and KO MEFs under untreated and glucose-starved conditions was performed. Scale bar, 20  $\mu$ M. The bar chart depicts the numbers of WIP12 puncta per cell.

(C) Followed by GluStv Immunoblot of phosphorylated ULK1 at serines 555, 317, and 777 in IPMK KO MEFs (myc) complemented with wIPMK or the kinase-dead form (KSA).

(D) Phosphorylation of AMPK in WT and KO MEFs after H<sub>2</sub>O<sub>2</sub> (500  $\mu$ M) treatment.

(E) IPMK WT and KO MEFs were treated with H<sub>2</sub>O<sub>2</sub> (500  $\mu$ M), followed by immunoblotting of phosphorylated ULK1 at serines 555, 317, and 777. The ATG 13 phosphorylation status indicates the ULK1 activation level. Data are means  $\pm$  SD.

Accordingly, we monitored phosphorylation of the ULK substrate ATG 13 (Egan et al., 2015; Orsi et al., 2012; Figure 3A). IPMK deletion abolished phosphorylation of ATG 13 under glucose starvation.

We next assessed WIP12 (WD repeat domain phosphoinositide-interacting protein 2) punctum formation, which correlates with the amount of PtdIns(3)P produced by the class III PtdIns(3) kinase complex (Russell et al., 2013; Dooley et al., 2014) and reflects activation of the autophagy-specific PtdIns(3) kinase VPS34. Activation of ULK elicits phosphorylation of VPS34 and stimulates its PtdIns(3) kinase activity (Dooley et al., 2014). Confocal imaging revealed that IPMK depletion of glucose-starved MEFs suppressed WIP12 punctum formation but not protein levels (Figure 3B).

We rescued the lost ULK phosphorylation of IPMK-deleted cells by overexpressing IPMK WT and the kinase-dead form, which restored these phosphorylation events (Figure 3C).

pho-AMPK were comparable with the WT (Figure 3D). Interestingly, ULK phosphorylation at the AMPK site after H<sub>2</sub>O<sub>2</sub> treatment was still significantly reduced in IPMK KO MEFs (Figure 3E). Thus, the loss of ULK phosphorylation in IPMK KOs is not just secondary to any alteration in AMPK phosphorylation.

### IPMK Regulates ULK Phosphorylation by Direct Binding Interactions

Because IPMK's regulation of autophagy does not require its kinase activity, we studied direct binding of IPMK to ULK. IPMK bound ULK regardless of whether the pull-down employed ULK or IPMK (Figure 4A). We also showed that endogenous ULK binds IPMK (Figure 4B). The absence of satisfactory antibodies to IPMK precluded evaluation of endogenous IPMK binding interactions. Utilizing *in vitro* systems, we did demonstrate direct binding of ULK and IPMK (Figures S4A and S4B). To

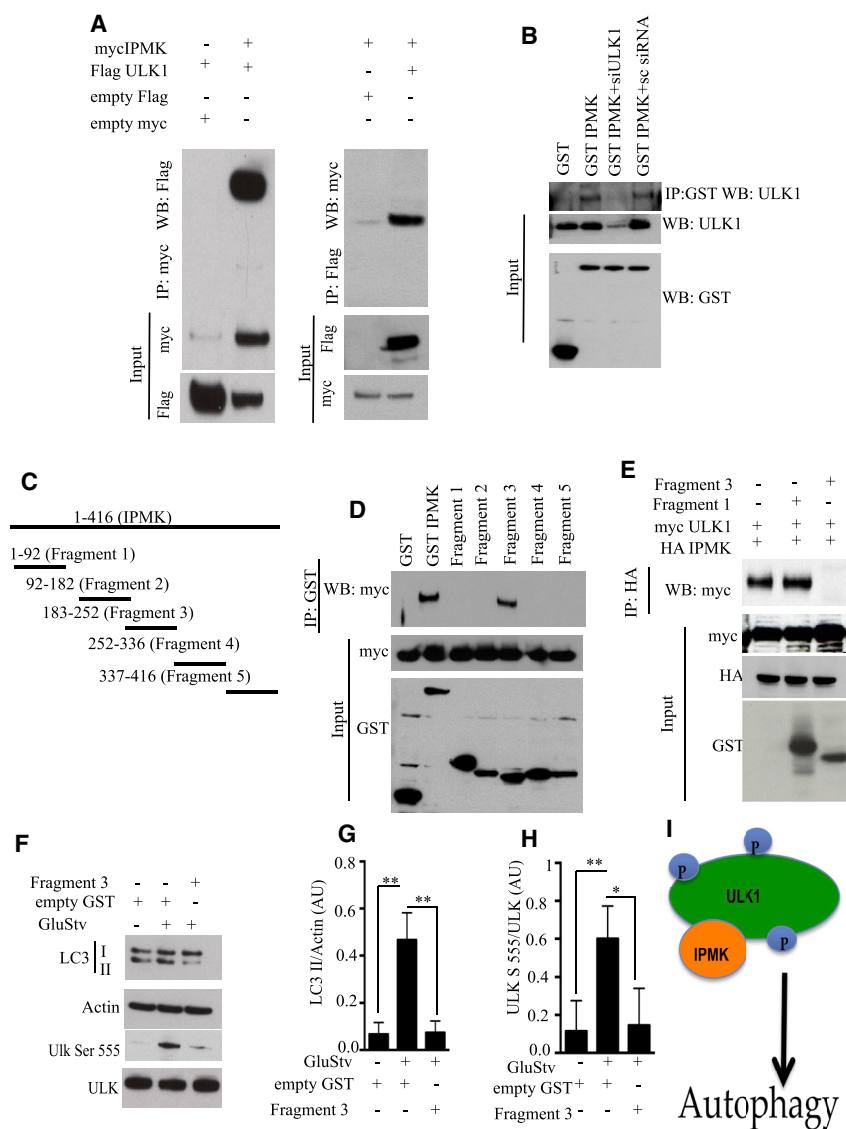

### Figure 4. IPMK Regulates ULK Phosphorylation by Direct Binding Interactions

(A) Empty myc, empty FLAG, myc IPMK, and FLAG ULK1 were co-transfected in HEK293 cells, and co-immunoprecipitation was performed (n = 4).

(B) Glutathione S-transferase (GST), GST IPMK, and GST IPMK in combination with small interfering RNA (siRNA) of ULK1 and scrambled (sc) siRNA were co-transfected in HEK293 cells. Immunoprecipitation of GST was followed by western blotting of endogenous ULK1.

(C) Schematic diagram of fragments of IPMK.

(D) Different fragments of GST IPMK were co-transfected with myc ULK1. Immunoprecipitation of GST followed by western blot of myc was performed to map IPMK binding to ULK1 (n = 3).

(E) Analysis of dominant negatives to assess binding of IPMK to ULK1 (n = 3).

(F) Overexpression of an IPMK dominant-negative fragment (fragment 3) in HEK293 cells, followed by GluStv for 6 h. Functional evaluation of the dominant-negative action of fragment 3 was performed by immunoblotting LC3II and ULK serine 555 (n = 3).

(G and H) Relative amounts of LC3II (G) and ULK serine 555 (H) are plotted (n = 3); \*\*\*p < 0.01, \*p < 0.05. Data are means ± SD.

(I) Schematic diagram of IPMK binding to ULK1, which facilitates ULK1 phosphorylation and activation of autophagy. Data are means ± SD.

facilitate manipulation of the IPMK and ULK system, we mapped sites on IPMK responsible for binding ULK (Figures 4C and 4D). Fragment 3, comprising amino acids 182–252, appeared to be a candidate dominant-negative structure because it substantially inhibited IPMK and ULK binding (Figure 4E). Acting as a dominant-negative fragment, fragment 3 reduced the influence of glucose starvation on LC3-II in HEK293 cells (Figures 4F–4H). In contrast, fragment 1, comprising amino acids 1–92, failed to influence LC3-II levels or ULK phosphorylation (Figure S4C). These findings indicate that binding of IPMK to ULK mediates ULK phosphorylation and autophagy (Figure 4I).

### Direct Binding of IPMK to AMPK Is Required for IPMK's Influence on Autophagy

In intact cells, overexpressed IPMK and AMPK bound to each other (Figure 5A). To determine whether binding was direct, we monitored the interactions of the purified IPMK and AMPK pro-

teins (Figures S5A and S5B). We observed substantial direct binding of IPMK and AMPK. We mapped binding sites on IPMK, establishing that the binding is primarily associated with fragment 2, comprising amino acids 92–182 (Figure 5B). Fragment 2 may offer promise as a dominant-negative fragment because it abolished IPMK and AMPK binding (Figure 5C). We employed fragment 2 as a dominant-negative fragment to explore the importance of IPMK in regulating ULK. Overexpressing fragment 2 greatly reduced ULK-S-555 phosphorylation as well as LC3 lipidation (Figures 5D–5F). Although fragment 5 bound AMPK, it failed to serve as a dominant-negative fragment (Figure S5C). Intriguingly, dominant-negative fragment 2 suppressed LC3b gene expression at mRNA levels (Figure S5D). These findings indicate that binding of IPMK to AMPK mediates ULK phosphorylation and autophagy (Figure 5G).

### IPMK Is Essential for AMPK and ULK Interactions

IPMK is required for binding of ULK and AMPK because their binding was abolished in IPMK KO MEFs with or without glucose starvation (Figure 6A). This action is selective because IPMK deletion did not influence binding of ULK to FIP200 (Figure 6B), ATG101 (Figure 6C), or ATG 13 (Figure 6D). We extended this finding to H<sub>2</sub>O<sub>2</sub> treatment, which acted the same as glucose starvation (Figures S6A–S6D). We buttressed these conclusions in



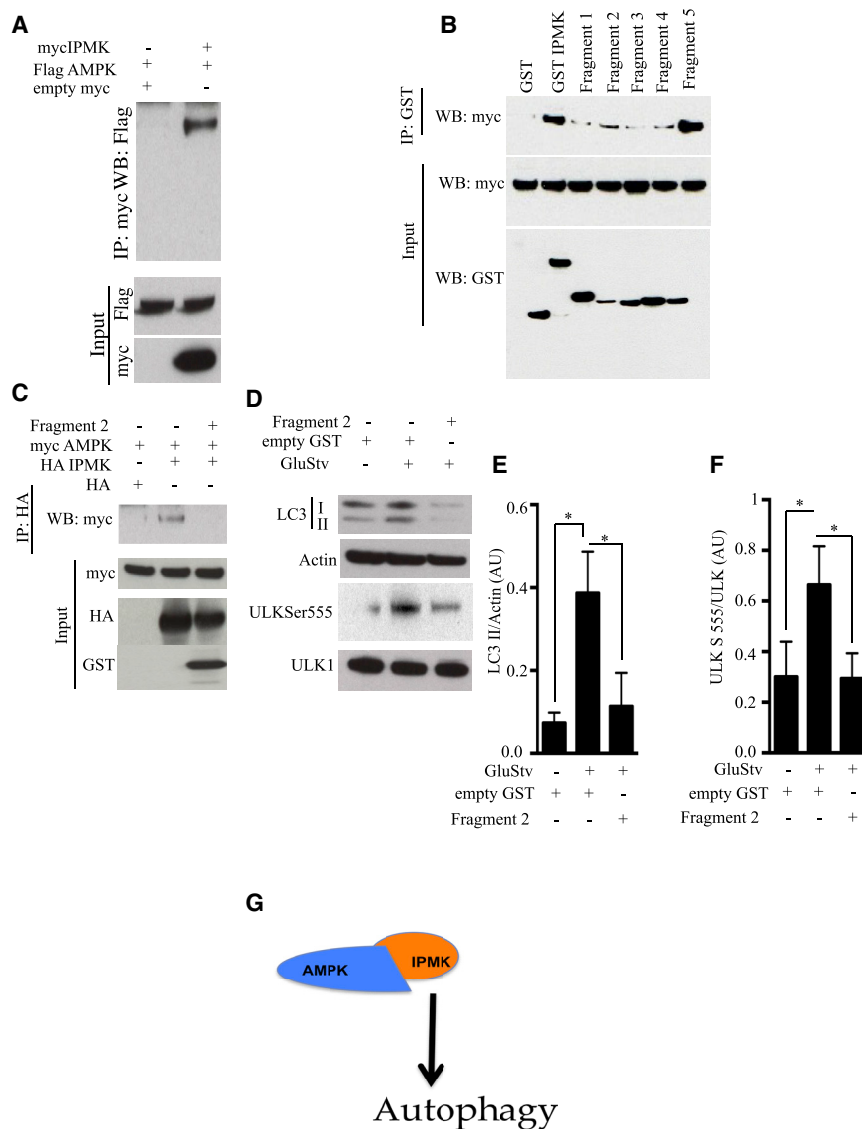

**Figure 5. Direct Binding of IPMK to AMPK Is Required for IPMK Influence on Autophagy**

(A) Empty myc, myc IPMK, and FLAG AMPK were co-transfected in combination in HEK293 cells, and co-immunoprecipitation was performed (n = 4).

(B) Different fragments of GST-IPMK were co-transfected with myc AMPK Alpha 2. Immunoprecipitation of GST followed by western blotting of myc was performed to map IPMK binding to AMPK (n = 3).

(C) Analysis of dominant negatives for binding of IPMK to AMPK (Kaur and Debnath, 2015).

(D) Overexpression of an IPMK dominant-negative fragment (fragment 2) in HEK293 cells, followed by GluStv for 6 h. Functional evaluation of dominant-negative action of fragment 2 was performed by immunoblotting LC3II and ULK serine 555 (n = 3).

(E and F) Relative amounts of LC3II (E) and ULK serine 555 (F) are plotted; \*p < 0.05. Data are means ± SD.

(G) Schematic diagram of IPMK binding to AMPK, facilitating ULK1 phosphorylation and activation of autophagy. Data are means ± SD.

tion induces hepatic autophagy and increases delivery of free fatty acids (FFAs) from adipose tissue lipolysis to the liver. Electron microscopy and oil red O staining revealed that both under untreated conditions and overnight starvation, the numbers of lipid droplets were substantially increased in F/F-AlbCre (liver-specific IPMK KO) mice compared with F/F (WT) mice (Figure 7B; Figure S7A), indicating impaired lipophagy in IPMK-deleted livers. The effect of IPMK and AMPK signaling on lipid droplet formation was analyzed by overexpressing fragment 2 (dominant-negative for IPMK and AMPK binding). The number of lipid droplets increased significantly in fragment 2 (Figure S7D).

experiments employing *in vitro* ULK phosphorylation by AMPK. Addition of recombinant human IPMK (hIPMK) (100 ng, 500 ng, and 1 μg) augmented AMPK-dependent ULK phosphorylation (Figure S6E). ULK phosphorylation reached saturation at 500 ng of IPMK. Thus, IPMK is essential for AMPK and ULK interactions and AMPK-dependent ULK phosphorylation (Figure 6E).

### IPMK Is Required for Lipophagy and Regulates Liver Inflammation and Hepatocyte Regeneration

Abundant data implicate IPMK in regulation of autophagy. One form of macroautophagy, called lipophagy, has been shown to contribute to hydrolysis of triacylglycerol stored in cytoplasmic lipid droplets. Accordingly, we evaluated a potential role of IPMK in regulating lipophagy. IPMK-deleted MEFs displayed a doubling of lipid droplets both in regular medium and with oleate treatment, indicating substantial diminution of lipophagy (Figure 7A). Starva-

We wondered whether IPMK deficiency affected overall liver function, which we assessed by monitoring the serum levels of alanine-leucine transaminase (ALT), which were unchanged in IPMK KOs and F/F-AlbCre mice (Figure S7B). We examined liver morphology by H&E staining, which was not altered in F/F-AlbCre mice. However, we observed a mild increase in inflammatory cell number in F/F-AlbCre livers as well as a modest enhancement of apoptotic cells (Figure 7C).

We evaluated the response of IPMK-deleted livers (F/F-AlbCre) to cytotoxic insults utilizing carbon tetrachloride (Ccl4) (Figure 7D). Damage was increased substantially in IPMK KO livers (Figure 7E). The damage associated with Ccl4 was especially notable, with increased numbers of inflammatory cells and apoptotic cell profiles as well as serum ALT levels (Figure S7C). These observations indicate that IPMK is cytoprotective. We also monitored liver regeneration following Ccl4 administration (Figures 7E and 7F). We measured Ki67, an index of

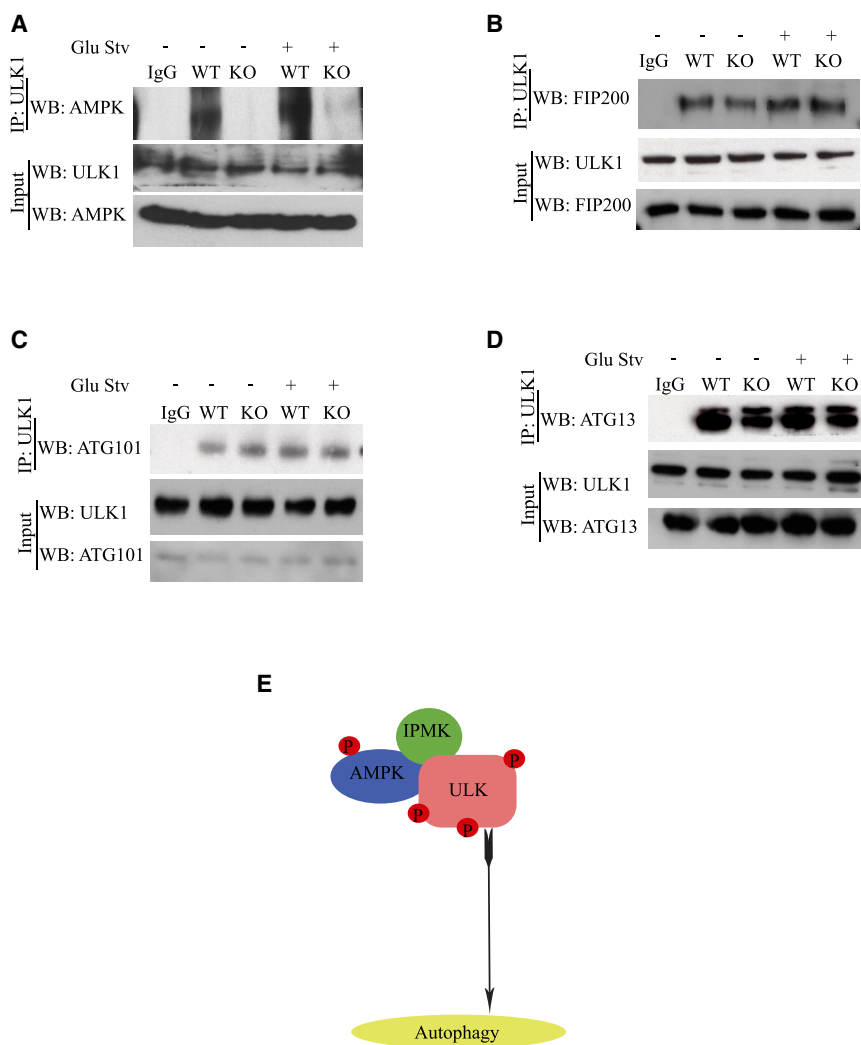

**Figure 6. IPMK Is Essential for AMPK and ULK1 Interactions**

(A–D) IPMK WT and KO MEFs were glucose-starved. The role of IPMK as a scaffold was analyzed by immunoprecipitation of endogenous ULK1 and western blotting of endogenous AMPK (A), FIP200 (B), ATG101 (C), and ATG 13 (D). (E) IPMK interacts with ULK and AMPK to form a ternary complex that facilitates AMPK-dependent ULK phosphorylation.

replicative cell activity, as well as 5-ethynyl-2'-deoxyuridine (EDU) incorporation into regenerating cells. Cell regeneration appeared to decrease by about 50% in IPMK KO livers.

## DISCUSSION

The present study establishes IPMK as a principal determinant of autophagy and of cytoprotection in the liver. Deletion of IPMK abolishes autophagy, monitored in multiple ways, indicating that IPMK is a physiological regulator of autophagy (Figure 1). Catalytic activity of IPMK is not required for this. Mechanistically, IPMK regulates autophagy in two different ways. (1) IPMK influences transcription of autophagy-related genes by regulating H4K16 deacetylation. (2) IPMK mediates AMPK-dependent ULK phosphorylation. We also showed that deletion of IPMK impairs lipophagy in cell lines and intact liver (Figures 7A and 7B). Most importantly, deletion of IPMK augments liver inflammation and impedes hepatocyte regeneration (Figures 7D and 7E).

IPMK KO mice die early in development, around embryonic day 9.5 (E9.5), because of severe growth and morphological de-

fects resembling the phenotype of mice with deletion of major autophagy-regulatory genes, such as Beclin 1, FIP200, and Ambra1 (Maag et al., 2011; Mizushima and Levine, 2010; Seeds et al., 2015). Deletion of IPMK in *Drosophila* substantially impairs adult tissue growth and stability (Seeds et al., 2015). Loss of yeast IPMK (Arg82) retards growth and increases susceptibility to stress-induced death (Szijgyarto et al., 2011). Moreover, deletion of yeast IPMK impairs autophagy and mitophagy (Taylor et al., 2012; Kanki et al., 2009).

How does IPMK influence the autophagic process? IPMK regulates autophagy through AMPK. AMPK initiates autophagy by regulating the transcription of autophagic genes and activating ULK. Nutrient deprivation promotes Sirt-1-mediated deacetylation of H4K16, followed by transcription of autophagy-related genes (Fullgrabe et al., 2013). AMPK enhances dissociation of Sirt-1 from its inhibitor DBC1 and stimulates transcription of autophagy-related genes

(Sakamaki et al., 2017). We found that deletion of IPMK markedly diminishes AMPK activation during glucose starvation and impairs AMPK-mediated H4K16 deacetylation (Figure 2). On the other hand, AMPK phosphorylates ULK at serines 555, 317, and 777 and activates autophagy by recruiting the beclin1 complex and activating the class III PI3K VPS34 (Lamb et al., 2013). AMPK-dependent ULK phosphorylation is abolished with deletion of IPMK (Figure 3). It could be anticipated that IPMK influences ULK phosphorylation by activating AMPK. However, with H<sub>2</sub>O<sub>2</sub> treatment, IPMK-deleted MEFs have increased levels of phospho-AMPK, comparable with the WT (Figure 3F), although ULK phosphorylation at the AMPK site is significantly diminished (Figure 3G). Protein-protein interaction studies confirmed that IPMK acts as a scaffold protein, linking AMPK with ULK (Figures 4, 5, and 6).

In summary, we present two signaling cascades, IPMK-AMPK-H4K16 and IPMK-AMPK-ULK, that regulate transcription and ULK phosphorylation to initiate autophagy (Figure S7E). IPMK positively regulates lipophagy and is also essential for cytoprotection of the liver and hepatocyte regeneration (Figures

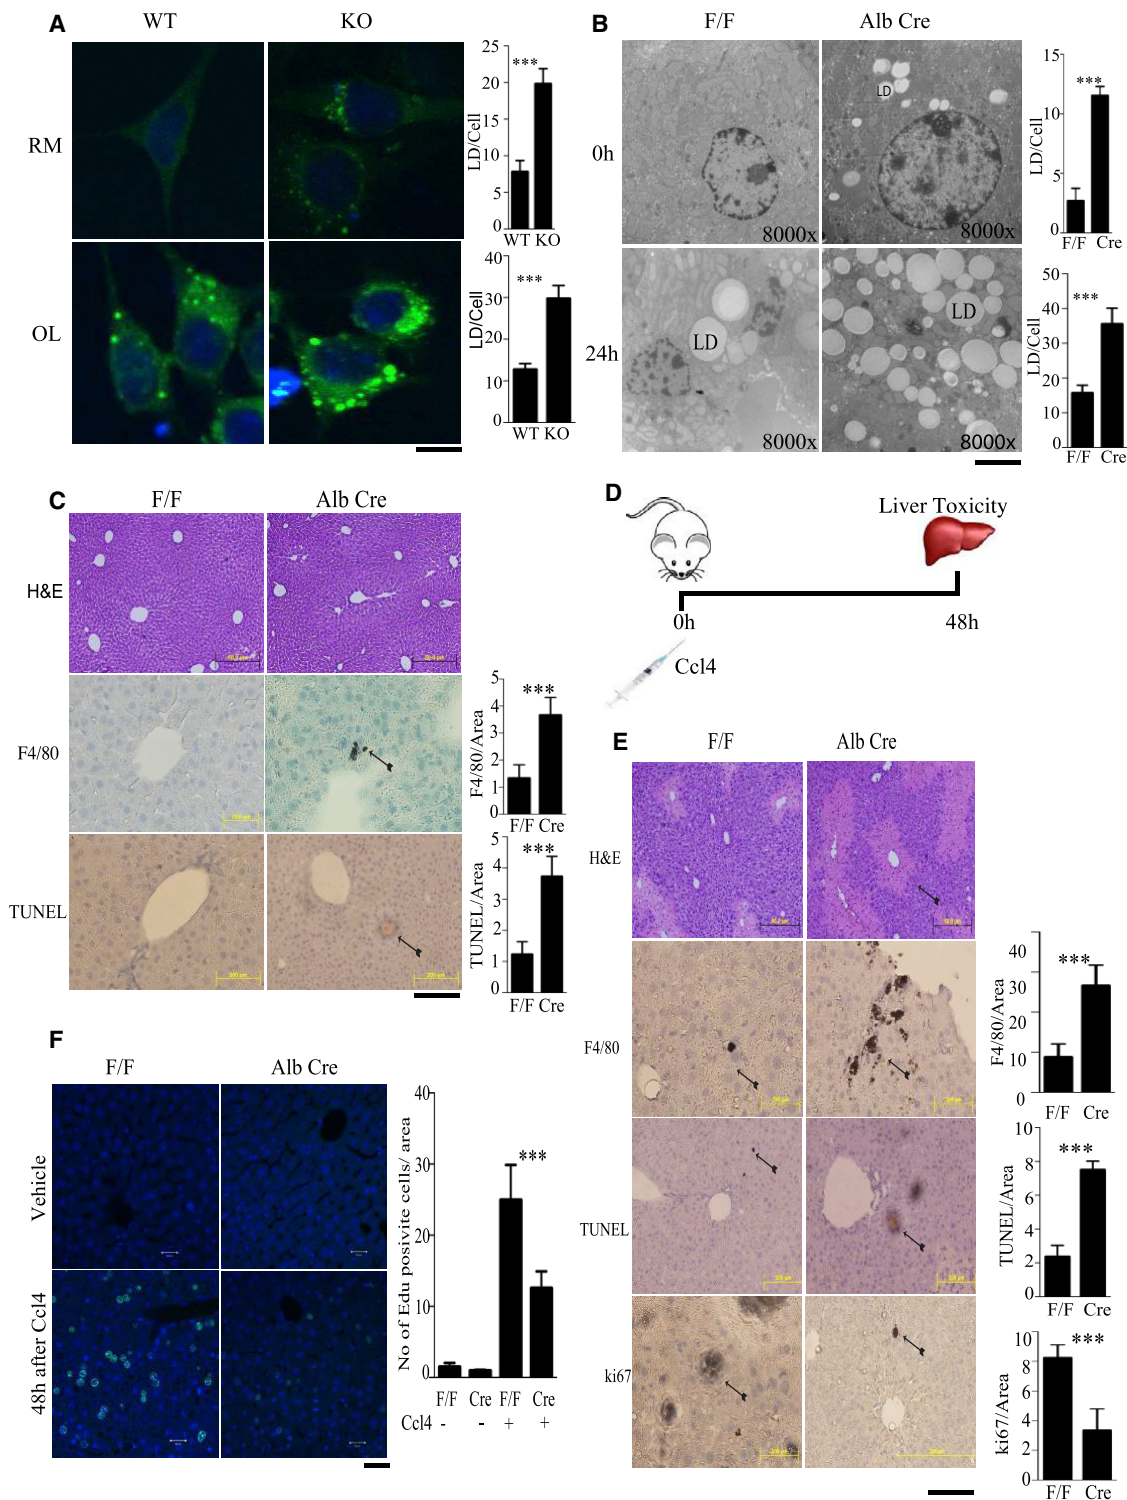

### Figure 7. IPMK Is Required for Lipophagy, Cytoprotection, and Cell Regeneration

(A) Triglyceride levels in IPMK WT and KO MEFs treated in regular medium (RM) or oleate (OL), measured by staining with boron-dipyrrromethene (BODIPY) 493/503. Relative amounts of lipid droplets (LDs) were plotted. \*\*\* $p < 0.001$ . Data are means  $\pm$  SD. Scale bar, 20  $\mu$ M.

(B) IPMK F/F and AlbCre mice were starved for 24 h, and livers were harvested for electron microscopy analysis of lipid droplets in untreated and 0-h- and 24-h-starved mice. Lipid droplets were counted and are represented as bars. \*\*\* $p < 0.001$ . Data are means  $\pm$  SD. Scale bar, 2  $\mu$ M.

(legend continued on next page)

7A–7F). Autophagy has been implicated in numerous conditions, such as neurodegenerative diseases, cocaine toxicity (Guha et al., 2016; Galluzzi et al., 2016; Yang et al., 2011), cancer, and obesity (Haim et al., 2015). IPMK's influence on autophagy may be also a major mediator of these diverse actions.

## STAR★METHODS

Detailed methods are provided in the online version of this paper and include the following:

- **KEY RESOURCES TABLE**
- **CONTACT FOR REAGENT AND RESOURCE SHARING**
- **EXPERIMENTAL MODEL AND SUBJECT DETAILS**
  - Animals
  - Cell culture
  - Generation of brain specific IPMK knock out mice
- **METHOD DETAILS**
  - Chemicals, antibodies and reagents
  - Cell culture
  - Generation of brain specific IPMK knock out mice
  - Autophagy activation in mouse liver
  - Activation of autophagy in cells
  - Transmission Electron Microscopy (TEM)
  - qPCR analysis
  - ChIP
  - Confocal microscopy of autophagy
  - Western blots
  - Immunoprecipitations
  - *In vitro* AMPK mediated ULK phosphorylation
  - Mice Liver toxicity and regeneration study
  - Analysis of lipophagy
  - Endogenous immunoprecipitation analysis
  - *In vitro* binding assay
  - Transfections
  - Intracellular inositol content profiling
  - Lentiviral Transduction
- **QUANTIFICATION AND STATISTICAL ANALYSIS**

## SUPPLEMENTAL INFORMATION

Supplemental Information can be found with this article online at <https://doi.org/10.1016/j.celrep.2019.02.013>.

## ACKNOWLEDGMENTS

We thank Dr. Robin Roychoudhuri for critical comments on the manuscript. We thank Lauren Albacarys for help with mouse experiments. This work was supported by NIH grant 5R01MH018501-48.

## AUTHOR CONTRIBUTIONS

P.G. and S.H.S. conceived and P.G. designed the experiments. P.G., R.T., S.C., C.F., R.X., L.A., R.B., and A.C.R. performed the experiments. P.G. analyzed the data. P.G. and R.T. analyzed the HPLC data. P.G. and S.H.S. wrote the manuscript.

## DECLARATION OF INTERESTS

The authors declare no competing interests.

Received: May 25, 2018

Revised: December 4, 2018

Accepted: February 1, 2019

Published: March 5, 2019

## REFERENCES

- Bang, S., Chen, Y., Ahima, R.S., and Kim, S.F. (2014). Convergence of IPMK and LKB1-AMPK signaling pathways on metformin action. *Mol. Endocrinol.* *28*, 1186–1193.
- Berger, S.L., and Sassone-Corsi, P. (2016). Metabolic Signaling to Chromatin. *Cold Spring Harb. Perspect. Biol.* *8*, a019463.
- Bosch, D., and Saiardi, A. (2012). Arginine transcriptional response does not require inositol phosphate synthesis. *J. Biol. Chem.* *287*, 38347–38355.
- Chauhan, S., Goodwin, J.G., Chauhan, S., Manyam, G., Wang, J., Kamat, A.M., and Boyd, D.D. (2013). ZKSCAN3 is a master transcriptional repressor of autophagy. *Mol. Cell* *50*, 16–28.
- Dooley, H.C., Razi, M., Polson, H.E., Girardin, S.E., Wilson, M.I., and Tooze, S.A. (2014). WIPI2 links LC3 conjugation with PI3P, autophagosome formation, and pathogen clearance by recruiting Atg12-5-16L1. *Mol. Cell* *55*, 238–252.
- Egan, D.F., Shackelford, D.B., Mihaylova, M.M., Gelino, S., Kohnz, R.A., Mair, W., Vasquez, D.S., Joshi, A., Gwinn, D.M., Taylor, R., et al. (2011). Phosphorylation of ULK1 (hATG1) by AMP-activated protein kinase connects energy sensing to mitophagy. *Science* *331*, 456–461.
- Egan, D.F., Chun, M.G., Vamos, M., Zou, H., Rong, J., Miller, C.J., Lou, H.J., Raveendra-Panickar, D., Yang, C.C., Sheffler, D.J., et al. (2015). Small Molecule Inhibition of the Autophagy Kinase ULK1 and Identification of ULK1 Substrates. *Mol. Cell* *59*, 285–297.
- Fader, C.M., and Colombo, M.I. (2009). Autophagy and multivesicular bodies: two closely related partners. *Cell Death Differ.* *16*, 70–78.
- Fullgrabe, J., Lynch-Day, M.A., Heldring, N., Li, W., Struijk, R.B., Ma, Q., Hermanson, O., Rosenfeld, M.G., Klionsky, D.J., and Joseph, B. (2013). The histone H4 lysine 16 acetyltransferase hMOF regulates the outcome of autophagy. *Nature* *500*, 468–471.
- Galluzzi, L., Bravo-San Pedro, J.M., Blomgren, K., and Kroemer, G. (2016). Autophagy in acute brain injury. *Nat. Rev. Neurosci.* *17*, 467–484.
- Guha, P., Harraz, M.M., and Snyder, S.H. (2016). Cocaine elicits autophagic cytotoxicity via a nitric oxide-GAPDH signaling cascade. *Proc. Natl. Acad. Sci. U.S.A.* *113*, 1417–1422.
- Haim, Y., Blucher, M., Slutsky, N., Goldstein, N., Kloting, N., Harman-Boehm, I., Kirshtein, B., Ginsberg, D., Gericke, M., Guiu Jurado, E., et al. (2015). Elevated

(C) Histology of intact livers from IPMK F/F and AlbCre mice. Tissue sections were stained with H&E to check cellular texture and immunostained with F4/80 to monitor inflammatory cells and terminal deoxynucleotidyl transferase dUTP nick end labeling (TUNEL) for apoptosis of hepatocytes. Inflammatory cells and TUNEL-positive cells were counted and are represented as bars.  $n = 4$ ,  $***p < 0.001$ . Data are means  $\pm$  SD. Scale bar, 200  $\mu$ M.

(D) Schematics of the experimental protocol. IPMK F/F and AlbCre mice were injected intraperitoneally with a single acute dose (2  $\mu$ g/g) of Ccl4, followed by liver harvest after 48 h of treatment.

(E) Staining of liver sections with H&E, F4/80, TUNEL, and Ki67. Inflammatory cells, TUNEL-positive cells, and Ki67-stained cells were counted and are represented as bars.  $n = 4$ ,  $***p < 0.001$ . Data are means  $\pm$  SD. Scale bar, 200  $\mu$ M.

(F) EDU incorporation in vehicle-treated and Ccl4-treated mouse livers. EDU-positive cells were counted and are represented as bars.  $n = 4$ ,  $***p < 0.001$ . Data are means  $\pm$  SD. Scale bar, 20  $\mu$ M.



- autophagy gene expression in adipose tissue of obese humans: A potential non-cell-cycle-dependent function of E2F1. *Autophagy* 11, 2074–2088.
- He, Y., Li, S., Zhang, W., Dai, W., Cui, T., Wang, G., Gao, T., and Li, C. (2017). Dysregulated autophagy increased melanocyte sensitivity to H<sub>2</sub>O<sub>2</sub>-induced oxidative stress in vitiligo. *Sci. Rep* 7, 42394.
- Itakura, E., and Mizushima, N. (2010). Characterization of autophagosome formation site by a hierarchical analysis of mammalian Atg proteins. *Autophagy* 6, 764–776.
- Joachim, J., Jefferies, H.B., Razi, M., Frith, D., Snijders, A.P., Chakravarty, P., Judith, D., and Tooze, S.A. (2015). Activation of ULK Kinase and Autophagy by GABARAP Trafficking from the Centrosome Is Regulated by WAC and GM130. *Mol. Cell* 60, 899–913.
- Kanki, T., Wang, K., Baba, M., Bartholomew, C.R., Lynch-Day, M.A., Du, Z., Geng, J., Mao, K., Yang, Z., Yen, W.L., and Klionsky, D.J. (2009). A genomic screen for yeast mutants defective in selective mitochondria autophagy. *Mol. Biol. Cell* 20, 4730–4738.
- Kaur, J., and Debnath, J. (2015). Autophagy at the crossroads of catabolism and anabolism. *Nat. Rev. Mol. Cell Biol.* 16, 461–472.
- Kim, J.E., Chen, J., and Lou, Z. (2008). DBC1 is a negative regulator of SIRT1. *Nature* 451, 583–586.
- Kim, S., Kim, S.F., Maag, D., Maxwell, M.J., Resnick, A.C., Juluri, K.R., Chakraborty, A., Koldobskiy, M.A., Cha, S.H., Barrow, R., et al. (2011a). Amino acid signaling to mTOR mediated by inositol polyphosphate multikinase. *Cell Metab.* 13, 215–221.
- Kim, J., Kundu, M., Viollet, B., and Guan, K.L. (2011b). AMPK and mTOR regulate autophagy through direct phosphorylation of Ulk1. *Nat. Cell Biol.* 13, 132–141.
- Kim, E., Tyagi, R., Lee, J.Y., Park, J., Kim, Y.R., Beon, J., Chen, P.Y., Cha, J.Y., Snyder, S.H., and Kim, S. (2013). Inositol polyphosphate multikinase is a coactivator for serum response factor-dependent induction of immediate early genes. *Proc. Natl. Acad. Sci. U.S.A.* 110, 19938–19943.
- Klionsky, D.J., Abdelmohsen, K., Abe, A., Abedin, M.J., Abeliovich, H., Acevedo Arozena, A., Adachi, H., Adams, C.M., Adams, P.D., Adeli, K., et al. (2016). Guidelines for the use and interpretation of assays for monitoring autophagy (3rd edition). *Autophagy* 12, 1–222.
- Lamb, C.A., Yoshimori, T., and Tooze, S.A. (2013). The autophagosome: origins unknown, biogenesis complex. *Nat. Rev. Mol. Cell Biol.* 14, 759–774.
- Maag, D., Maxwell, M.J., Hardesty, D.A., Boucher, K.L., Choudhari, N., Hanno, A.G., Ma, J.F., Snowman, A.S., Pietropaoli, J.W., Xu, R., et al. (2011). Inositol polyphosphate multikinase is a physiologic PI3-kinase that activates Akt/PKB. *Proc. Natl. Acad. Sci. U.S.A.* 108, 1391–1396.
- Mizushima, N., and Levine, B. (2010). Autophagy in mammalian development and differentiation. *Nat. Cell Biol.* 12, 823–830.
- Nimmerjahn, F., Milosevic, S., Behrends, U., Jaffee, E.M., Pardoll, D.M., Bornkamm, G.W., and Mautner, J. (2003). Major histocompatibility complex class II-restricted presentation of a cytosolic antigen by autophagy. *Eur. J. Immunol.* 33, 1250–1259.
- Orsi, A., Razi, M., Dooley, H.C., Robinson, D., Weston, A.E., Collinson, L.M., and Tooze, S.A. (2012). Dynamic and transient interactions of Atg9 with autophagosomes, but not membrane integration, are required for autophagy. *Mol. Biol. Cell* 23, 1860–1873.
- Quinsay, M.N., Thomas, R.L., Lee, Y., and Gustafsson, A.B. (2010). Bnip3-mediated mitochondrial autophagy is independent of the mitochondrial permeability transition pore. *Autophagy* 6, 855–862.
- Russell, R.C., Tian, Y., Yuan, H., Park, H.W., Chang, Y.Y., Kim, J., Kim, H., Neufeld, T.P., Dillin, A., and Guan, K.L. (2013). ULK1 induces autophagy by phosphorylating Beclin-1 and activating VPS34 lipid kinase. *Nat. Cell Biol.* 15, 741–750.
- Sakamaki, J.I., and Ryan, K.M. (2017). Transcriptional regulation of autophagy and lysosomal function by bromodomain protein BRD4. *Autophagy* 13, 2006–2007.
- Sakamaki, J.I., Wilkinson, S., Hahn, M., Tasdemir, N., O’Prey, J., Clark, W., Hedley, A., Nixon, C., Long, J.S., New, M., et al. (2017). Bromodomain Protein BRD4 Is a Transcriptional Repressor of Autophagy and Lysosomal Function. *Mol. Cell* 66, 517–532.e9.
- Seeds, A.M., Tsui, M.M., Sunu, C., Spana, E.P., and York, J.D. (2015). Inositol phosphate kinase 2 is required for imaginal disc development in *Drosophila*. *Proc. Natl. Acad. Sci. U.S.A.* 112, 15660–15665.
- Sharifi, M.N., Mowers, E.E., Drake, L.E., Collier, C., Chen, H., Zamora, M., Mui, S., and Macleod, K.F. (2016). Autophagy Promotes Focal Adhesion Disassembly and Cell Motility of Metastatic Tumor Cells through the Direct Interaction of Paxillin with LC3. *Cell Rep* 15, 1660–1672.
- Slobodkin, M.R., and Elazar, Z. (2013). The Atg8 family: multifunctional ubiquitin-like key regulators of autophagy. *Essays Biochem.* 55, 51–64.
- Szjgyarto, Z., Garedeu, A., Azevedo, C., and Saiardi, A. (2011). Influence of inositol pyrophosphates on cellular energy dynamics. *Science* 334, 802–805.
- Taylor, R., Jr., Chen, P.H., Chou, C.C., Patel, J., and Jin, S.V. (2012). KCS1 deletion in *Saccharomyces cerevisiae* leads to a defect in translocation of autophagic proteins and reduces autophagosome formation. *Autophagy* 8, 1300–1311.
- Watson, P.J., Fairall, L., Santos, G.M., and Schwabe, J.W. (2012). Structure of HDAC3 bound to co-repressor and inositol tetrakisphosphate. *Nature* 481, 335–340.
- Xu, R., Paul, B.D., Smith, D.R., Tyagi, R., Rao, F., Khan, A.B., Blech, D.J., Vandiver, M.S., Harraz, M.M., Guha, P., et al. (2013). Inositol polyphosphate multikinase is a transcriptional coactivator required for immediate early gene induction. *Proc. Natl. Acad. Sci. U.S.A.* 110, 16181–16186.
- Yang, S., Wang, X., Contino, G., Liesa, M., Sahin, E., Ying, H., Bause, A., Li, Y., Stommel, J.M., Dell’antonio, G., et al. (2011). Pancreatic cancers require autophagy for tumor growth. *Genes Dev.* 25, 171–179.
- Zhang, J., and Ney, P.A. (2009). Role of BNIP3 and NIX in cell death, autophagy, and mitophagy. *Cell Death Differ* 16, 939–946.
- Zmijewski, J.W., Banerjee, S., Bae, H., Friggeri, A., Lazarowski, E.R., and Abraham, E. (2010). Exposure to hydrogen peroxide induces oxidation and activation of AMP-activated protein kinase. *J. Biol. Chem.* 285, 33154–33164.

## STAR★METHODS

### KEY RESOURCES TABLE

| REAGENT or RESOURCE               | SOURCE                  | IDENTIFIER                   |
|-----------------------------------|-------------------------|------------------------------|
| <b>Antibodies</b>                 |                         |                              |
| Actin                             | Cell Signaling          | 4967; RRID: AB_330288        |
| LC3B                              | Cell Signaling          | 2775; RRID: AB_915950        |
| Atg5                              | Cell Signaling          | 2630; RRID: AB_2062340       |
| myc                               | Cell Signaling          | 2276; RRID: AB_331783        |
| VPS34                             | Cell Signaling          | 3811; RRID: AB_2062856       |
| ULK5317                           | Cell Signaling          | 12753; RRID: AB_2687883      |
| ULK S 757                         | Cell Signaling          | 6888; RRID: AB_10829226      |
| Beclin                            | Cell Signaling          | 3738; RRID: AB_490837        |
| Beclin S 15                       | Cell Signaling          | 84966                        |
| VPS34 S 249                       | Cell Signaling          | 13857                        |
| AMPK                              | Cell Signaling          | 2532; RRID: AB_330331        |
| AMPK Thr 172                      | Cell Signaling          | 2535; RRID: AB_331250        |
| Flag                              | Cell Signaling          | 8146; RRID: AB_10950495      |
| GST                               | Cell Signaling          | 2622; RRID: AB_331670        |
| HA                                | Cell Signaling          | 2367; RRID: AB_10691311      |
| DBC1                              | Cell Signaling          | 5693; RRID: AB_10706910      |
| GFP                               | Cell Signaling          | 2555; RRID: AB_10692764      |
| IgG control                       | Cell Signaling          | 2729; RRID: AB_1031062       |
| ATG 13                            | Genetex                 | GTX123970                    |
| FIP200                            | Genetex                 | GTX107387; RRID: AB_10730495 |
| ATG101                            | Genetex                 | GTX31415                     |
| Bnip3                             | Genetex                 | GTX111902; RRID: AB_1949753  |
| ATG12                             | Genetex                 | GTX124181; RRID: AB_11171947 |
| GABARAPL1                         | Genetex                 | GTX132664                    |
| BNIP3L                            | Genetex                 | GTX111876; RRID: AB_2036357  |
| Human IPMK                        | Genetex                 | GTX104954; RRID: AB_1950594  |
| ULK1 for IP                       | Sigma                   | A7481; RRID: AB_1840703      |
| HRP- ANTI MOUSE                   | GE Health care          | NA931V; RRID: AB_772210      |
| HRP-ANTI RABBIT                   | GE Health care          | GENA934; RRID: AB_2722659    |
| ULK S 555                         | MILLIPORE               | ABC124; RRID: AB_11205237    |
| ULK S 777                         | MILLIPORE               | ABC213                       |
| Sirt-1                            | Santacruz Biotechnology | Sc74465; RRID: AB_1229462    |
| ULK1 for WB                       | Santacruz Biotechnolo   | Sc33182; RRID: AB_2214706    |
| H4k16ac                           | Active Motif            | 39168; RRID: AB_2636968      |
| H4                                | Active Motif            | 61300; RRID: AB_2650524      |
| Mouse specific Anti-IPMK          | Lab generated           | NA                           |
| F4/80                             | Biorad                  | MCA497RT; RRID: AB_1102558   |
| Ki67                              | Abcam                   | ab16667; RRID: AB_302459     |
| <b>Biological Samples</b>         |                         |                              |
| pMXs-puroGFP-DFCP1                | Addgene                 | 38269                        |
| pCDNA6-myc ULK1 wt (Plasmid)      | Addgene                 | 27629                        |
| pCDNA3 Flag ULK1 (Plasmid)        | Addgene                 | 27636                        |
| pCDNA3 myc AMPK Alpha 2 (Plasmid) | Addgene                 | 15991                        |

(Continued on next page)

| <b>Continued</b>                                        |                           |               |
|---------------------------------------------------------|---------------------------|---------------|
| REAGENT or RESOURCE                                     | SOURCE                    | IDENTIFIER    |
| pBABE-puro-GFP-LC3 (Plasmid)                            | Addgene                   | 22405         |
| pCMV-AMPK alpha 2 Flag (Plasmid) pCMV mycIPMK (plasmid) | Sinobiologicals           | HG10394-CF    |
| pCMV Flag                                               | Snyder lab                | NA            |
| Chemicals, Peptides, and Recombinant Proteins           |                           |               |
| Recombinant hIPMK                                       | Origene                   | TP309343      |
| Recombinant hULK1                                       | Signalchem                | U01-11G       |
| Recombinant purified AMPK complex                       | Signal Chem               | P47-10H-05    |
| Critical Commercial Assays                              |                           |               |
| Gen Elute Mammalian Total RNA miniprep Kit              | Sigma                     | RTN10         |
| Revert Aid H minus first strand cDNA synthesis kit      | Fermentas Life Sciences   | K1631         |
| Sybr green PCR mater mix                                | Invitrogen                | 4309155       |
| ChIP Assay kit                                          | Millipore-Sigma           | 415           |
| ChIP DNA purification kit                               | Active Motif              | 58002         |
| Click-it Edu Staining Kit                               | Thermofisher              | C10337        |
| Chemicals, Peptides, and Recombinant Proteins           |                           |               |
| Recombinant hIPMK                                       | Origene                   | TP309343      |
| Recombinant hULK1                                       | Signalchem                | U01-11G       |
| Recombinant purified AMPK complex                       | Signal Chem               | P47-10H-05    |
| FBS                                                     | Sigma                     | F2442         |
| L-glutamine                                             | Thermo Fischer Scientific | 25030081      |
| Penicillin                                              | Thermo Fischer Scientific | 10378016      |
| DMEM (w/o glucose)                                      | Thermo Fischer Scientific | 11966025      |
| DMEM (w/o sodium pyruvate)                              | Thermo Fischer Scientific | 11965092      |
| PVDF Membrane                                           | MilliporeSigma            | IPVH00010     |
| Lipofectamine 2000                                      | Thermo Fischer Scientific | 11668019      |
| Lipofectamine 3000                                      | Thermo Fischer Scientific | L3000015      |
| Polyfect                                                | QIAGEN                    | 301105        |
| CCI4                                                    | Sigma                     | 270652        |
| Paraformaldehyde 4% Solution in PBS                     | Santacruz Biotechnology   | 30525-89-4    |
| Oleate                                                  | Sigma                     | O1008-1G      |
| [3H]myo-inositol                                        | PerkinElmer               | NET1168001MC  |
| 1% Formaldehyde                                         | Sigma-Aldrich             | F8775         |
| Ezview myc beads                                        | Sigma                     | E6654         |
| Flag beads                                              | Sigma                     | F2426         |
| Hematoxylin                                             | Sigma                     | 1092490500    |
| TumorTACS <i>In Situ</i> Apoptosis Detection Kit        | R&D Systems               | 4815-30-K     |
| Ezview GST beads                                        | Sigma                     | E6406         |
| BIODIPY 493/503                                         | Thermofisher              | D3922         |
| Simply Blue Safe Stain                                  | Invitrogen                | LC6060        |
| Recombinant hIPMK                                       | Origene                   | TP309343      |
| Recombinant hULK1                                       | Signalchem                | U01-11G       |
| Recombinant purified AMPK complex                       | Signal Chem               | P47-10H-05    |
| Experimental Models: Cell Lines                         |                           |               |
| Mouse embryonic fibroblast                              | Snyder lab                | N/A           |
| 786-0 human renal cancer cell                           | ATCC                      | ATCC-CRL-1932 |
| Hunan embryonic kidney cell                             | ATCC                      | ATCC-CRL-1573 |

(Continued on next page)

| <b>Continued</b>                              |                    |                                                                                                                                                                                                                                   |
|-----------------------------------------------|--------------------|-----------------------------------------------------------------------------------------------------------------------------------------------------------------------------------------------------------------------------------|
| REAGENT or RESOURCE                           | SOURCE             | IDENTIFIER                                                                                                                                                                                                                        |
| Experimental Models: Organisms/Strains        |                    |                                                                                                                                                                                                                                   |
| IPMK F/F mice129SV- C57BL/6 mixed background. | Ozgene             | Custom developed                                                                                                                                                                                                                  |
| Albumin Cre miceC57BL/6J                      | Jackson laboratory | 3574                                                                                                                                                                                                                              |
| Oligonucleotides                              |                    |                                                                                                                                                                                                                                   |
| catcgtgagaaggctccta- gabarapl1 (mF)           | Invitrogen         | N/A                                                                                                                                                                                                                               |
| atacagctggcccatgtag- gabarapl1 (mR)           | Invitrogen         | N/A                                                                                                                                                                                                                               |
| AACAAAGAAATGGGCTGTGG – ATG12 (mF)             | Invitrogen         | N/A                                                                                                                                                                                                                               |
| TTGCAGTAATGCAGGACCAG- ATG12 (mR)              | Invitrogen         | N/A                                                                                                                                                                                                                               |
| CCTCGTCTCCATCCACAAT- bnip3l (mF)              | Invitrogen         | N/A                                                                                                                                                                                                                               |
| GTCCCTGCTGGTATGCATCT- bnip3l (mR)             | Invitrogen         | N/A                                                                                                                                                                                                                               |
| TGGCCACCTCTCTGATAGCT- p62 (mF)                | Invitrogen         | N/A                                                                                                                                                                                                                               |
| TCATCGTCTCCTCCTGAGCA- p62 (mR)                | Invitrogen         | N/A                                                                                                                                                                                                                               |
| Human shIPMK                                  | Sigma              | TRCN0000196885                                                                                                                                                                                                                    |
| Human shIPMK                                  | Sigma              | TRCN0000219804                                                                                                                                                                                                                    |
| Human shIPMK                                  | Sigma              | TRCN0000196360                                                                                                                                                                                                                    |
| Scrambled shRNA                               | Sigma              | SHC016V                                                                                                                                                                                                                           |
| mBECLIN1                                      | Taqman Fisher      | Mm01265461                                                                                                                                                                                                                        |
| mBNIP3                                        | Taqman Fisher      | Mm01275600                                                                                                                                                                                                                        |
| mSQSTM1                                       | Taqman Fisher      | Mm00448091                                                                                                                                                                                                                        |
| hIPMK                                         | Taqman Fisher      | Hs00852670                                                                                                                                                                                                                        |
| h18S                                          | Taqman Fisher      | Hs99999901                                                                                                                                                                                                                        |
| Software and Algorithms                       |                    |                                                                                                                                                                                                                                   |
| Imaris x64 9.0.2                              | BITPLANE           | <a href="https://www.bitplane.com/">https://www.bitplane.com/</a>                                                                                                                                                                 |
| ZEN lite                                      | Carl Zeiss         | <a href="https://www.zeiss.com/microscopy/int/downloads.html?vaURL=www.zeiss.com/microscopy/int/downloads/zen.html">https://www.zeiss.com/microscopy/int/downloads.html?vaURL=www.zeiss.com/microscopy/int/downloads/zen.html</a> |
| ImageJ                                        | NIH IMAGEJ         | <a href="https://imagej.nih.gov/ij/">https://imagej.nih.gov/ij/</a>                                                                                                                                                               |
| Graphpad prism 8                              | Graphpad prism     | <a href="https://www.graphpad.com/scientific-software/prism/">https://www.graphpad.com/scientific-software/prism/</a>                                                                                                             |
| Illustrator CC                                | Adobe              | <a href="https://www.adobe.com/products/illustrator.html">https://www.adobe.com/products/illustrator.html</a>                                                                                                                     |
| Photoshop CC                                  | Adobe              | <a href="https://www.adobe.com/products/photoshop.html">https://www.adobe.com/products/photoshop.html</a>                                                                                                                         |

## CONTACT FOR REAGENT AND RESOURCE SHARING

Further information and requests for resources and reagents should be directed to and will be fulfilled by the Lead Contact, Solomon H. Snyder MD ([ssnyder@jhmi.edu](mailto:ssnyder@jhmi.edu)).

## EXPERIMENTAL MODEL AND SUBJECT DETAILS

### Animals

All protocols were approved by the Johns Hopkins University Animal Care and Use Committee. Mice were housed according to institutional guidelines, in a controlled environment at a temperature of 22°C ± 1°C, under a 12-h dark-light period and provided with standard chow diet and water *ad libitum*. Male and female IPMK F/F, IPMK F/F-Alb Cre, (between 1 and 3-month-old) were used. Specifically, male mice were used for liver regeneration study, electron microscopy and tissue histology. All mice were maintained in 129SV-C57BL/6 mixed background.



### Cell culture

Mouse embryonic fibroblasts (MEF) and human embryonic kidney HEK293T cells (American Type Culture Collection) were maintained in a humid atmosphere of 95% air and 5% CO<sub>2</sub> at 37°C in DMEM 786-0 renal cancer cell was marinated in RPMI-1640 supplemented with 10% FBS, L-glutamine (2 mM), and penicillin (100 units/mL)/streptomycin (100 mg/mL). Retroviral transfection and generation of stably transfected cells:

Retroviral constructs (5) were transiently transfected into a Platinum-E retroviral packaging cell line for 48 h by using Lipofectamine 2000 transfection reagent. The high-titer viral stocks were produced by passing the supernatant using a 0.45 μm pore size-filter. For infection, MEFs were incubated with the viral supernatant in the presence of polybrene (8 μg/mL) for 48 h. Stably infected MEFs were selected with blasticidin (4 μg/mL) for 1-2 weeks. Selected stable cell lines were always maintained in respective medium containing blasticidin (4 μg/mL).

### Generation of brain specific IPMK knock out mice

IPMK F/F mice were generated as described previously (5). To develop brain specific IPMK KO, IPMKfl/fl mice were crossed with FLP delete (Neomycin) and Nestin Cre driver (brain specific cre driver) mice. FRT sites flanking the neomycin resistance gene facilitate its removal by FLP recombinase, and loxP sites facilitate removal of the targeted exon 6 by Cre recombinase. IPMKfl/fl mice were mated with mice expressing FLP recombinase to excise the neomycin resistance gene to generate IPMKflipped/flipped mice (we refer IPMK F/F in the paper). Homozygous IPMK F/F mice were crossed with the Albumin Cre<sup>+/–</sup> mice, which mediate excision of floxed alleles in liver, mostly in hepatocytes. Genotyping was performed using a transnetx genotyping facility. All mice were maintained on a 129SV-C57BL/6 mixed background. Animal care and experimentations were approved by the Johns Hopkins University Animal Care and Use Committee. Mice were housed in a 12-h light/12-h dark cycle, at an ambient temperature of 22°C, and fed standard rodent chow.

## METHOD DETAILS

### Chemicals, antibodies and reagents

Hydrogen peroxide, bafilomycin, antifade gold mounting medium, FBS, L-glutamine, penicillin /streptomycin, DMEM without glucose, DMEM without sodium pyruvate for H<sub>2</sub>O<sub>2</sub> treatment medium, PVDF membrane, DMSO cell culture grade, Lipofectamine 2000, Lipofectamine 3000 were purchased from Thermo Fisher Scientific. Polyfect was purchased from qiagen. Antibodies for actin, LC3, ATG5, myc, VPS34, ULK ser 317, ULK ser 757, ATG 13, ATG 13pSer 318, Beclin1, Beclin Ser 15, VPS34 Ser 249, AMPK, PAMPK Thr 172, Flag, GST, HA, FIP200, ATG101 were purchased from Cell Signaling Technology. ULK1ser555 and ULK ser 777 were from Millipore. ULK1 for immunoprecipitation was purchased from Sigma. Ulk1 for western blots was purchased from Santacruz Biotechnology. Anti-mouse IPMK was developed in our lab.

### Cell culture

Mouse embryonic fibroblasts (MEF) and human embryonic kidney HEK293T cells (American Type Culture Collection) were maintained in a humid atmosphere of 95% air and 5% CO<sub>2</sub> at 37°C in DMEM supplemented with 10% FBS, L-glutamine (2 mM), and penicillin (100 units/mL)/streptomycin (100 mg/mL). PC12 (ATCC) cells were maintained in DMEM supplemented with 10% (vol/vol) horse serum, 5% (vol/vol) FBS, and 2 mM L-glutamine.

### Generation of brain specific IPMK knock out mice

IPMK F/F mice were generated as described previously (5). To develop brain specific IPMK KO, IPMKfl/fl mice were crossed with FLP delete (Neomycin) and Nestin Cre driver (brain specific cre driver) mice. FRT sites flanking the neomycin resistance gene facilitate its removal by FLP recombinase, and loxP sites facilitate removal of the targeted exon 6 by Cre recombinase. IPMKfl/fl mice were mated with mice expressing FLP recombinase to excise the neomycin resistance gene to generate IPMKflipped/flipped mice. Homozygous IPMKflipped/flipped mice were crossed with the Albumin Cre<sup>+/–</sup> mice, which mediate excision of floxed alleles in liver, mostly in hepatocytes. Genotyping was performed using a transnetx genotyping facility. All mice were maintained on a 129SV-C57BL/6 mixed background. Animal care and experimentations were approved by the Johns Hopkins University Animal Care and Use Committee. Mice were housed in a 12-h light/12-h dark cycle, at an ambient temperature of 22°C, and fed standard rodent chow.

### Plasmids and recombinant proteins

The following plasmids were from Addgene: pMXs-puroGFP-DFCP1, pCDNA6-myc ULK1 wt, pCDNA3 Flag ULK1, pCDNA3 myc AMPK Alpha 2, pBABE-puro-mCherry-GFP-LC3, and pBABE-puro-GFP-LC3. pCMV-AMPK alpha 2 Flag was from Sinobiologicals. Our lab generated pCMV-IPMK-GST and different fragments tagged with GST, pCMV-myc-IPMK, pCMV-HA-IPMK, pMX-myc, pMX-myc IPMK WT, and pMX-myc KSA. Constitutively active AMPK was a kind gift from Dr. Anne Burnet (Stanford University School of Medicine, Stanford, CA). We purchased recombinant hIPMK from Origene. Recombinant hULK1 and AMPK were purchased from Signalchem.

### Autophagy activation in mouse liver

Mice (male) were starved overnight followed feeding for 6 h to synchronize the food cycle. Then one group of mice was allowed to feed, while a second group of mice (IPMK F/F and IPMK F/F-Albumin Cre) was starved for 24 h. Starvation of food induced autophagy in liver was analyzed by western blot of LC3-II and ULK ser 555. Each group comprised 3 mice.

### Activation of autophagy in cells

$1 \times 10^5$  Cells (MEF and others) were glucose starved for 8 h followed by lysing them for biochemical analysis(30). Oxidative stress was elicited by treatment with H<sub>2</sub>O<sub>2</sub> (500  $\mu$ M) for 30 min, which induced substantial autophagy in MEFs and other cell lines. Autophagic flux was analyzed using Baf A1 100 nM to inhibit lysosomal degradation of autophagic vesicles (12). Autophagy was analyzed either by western blot of LC3-II, transmission electron microscopy, or confocal microscopy.

### Transmission Electron Microscopy (TEM)

MEFs were treated with indicated concentrations of H<sub>2</sub>O<sub>2</sub>, bafilomycin, or by glucose starvation. The cells were fixed in 2.5% glutaraldehyde, 3 mM MgCl<sub>2</sub>, in 0.1 M sodium cacodylate buffer, pH 7.2, for one h at room temperature. After buffer rinse, samples were post-fixed in 1% osmium tetroxide in buffer (1 h) on ice in the dark. The cells were stained with 2% aqueous uranyl acetate (0.22  $\mu$ m filtered, 1 h in the dark), dehydrated in a graded series of ethanol solutions and embedded in Eponate 12 (Ted Pella) resin. Samples were polymerized at 37°C for 2-3 days before moving to 60°C overnight. Thin sections, 60 to 90 nm, were cut with a diamond knife on a Reichert-Jung Ultracut E ultramicrotome and picked up with 2x1 mm copper slot grids. Grids were stained with 2% uranyl acetate in 50% methanol and lead citrate at 4°C and observed with a Hitachi 7600 TEM. Images were captured with an AMT CCD XR50 (2K x 2K) camera. Classification and counting of autophagic vacuoles were done by double-blinded independent observers.

To study liver tissue we starved mice for 24 h followed by surgical excision of the liver. Livers were fixed in 2% (wt/vol) paraformaldehyde (freshly prepared from EM grade prill form), 2% (vol/vol) glutaraldehyde, 3 mM MgCl<sub>2</sub>, in 0.1 M sodium cacodylate buffer, pH 7.2, overnight. Regions of interest were dissected and samples were washed in 0.1 M sodium cacodylate buffer with 3 mM MgCl<sub>2</sub> and 3% (wt/vol) sucrose. Samples were postfixed in reduced 2% (wt/vol) osmium tetroxide, 1.6% (wt/vol) potassium ferrocyanide in buffer (2 h) on ice in the dark. Samples were stained with 2% (wt/vol) aqueous uranyl acetate (0.22  $\mu$ m filtered, 1 h in the dark), dehydrated in a graded series of ethanol propylene oxide solutions, and embedded in Eponate 12 (Ted Pella) resin. Samples were polymerized at 60°C overnight. Thin sections (60–90 nm) were cut with a diamond knife on a Reichert-Jung Ultracut E ultramicrotome and picked up with 2 x 1 mm copper slot grids. Grids were stained with 2% (wt/vol) uranyl acetate in 50% (vol/vol) methanol and lead citrate at 4°C and observed with a Hitachi 7600 TEM. Images were captured with an AMT CCD XR50 (2K x 2K) camera.

### qPCR analysis

After extracting the total RNA using Gen Elute Mammalian Total RNA miniprep kits (Sigma), and checking its integrity by electrophoresis, the cDNA was synthesized from 1 mg of purified total RNA using Revert Aid H minus first strand cDNA synthesis kit (Fermentas Life Sciences, Ontario, Canada). Expression of mouse and human IPMK, mouse LC3B, mouse BNIP3 and mouse GAPDH was detected using suitably designed Taqman primers (Invitrogen). Other genes such as mouse BNIP3L, P62, GABARAP1 and ATG12 were determined using primers given in the table. qPCR of these genes was performed using power Sybr green pcr mater mix from Invitrogen. Expression of the designated enzymes was normalized against glyceraldehyde-3-phosphate dehydrogenase (GAPDH) as the internal reference. The experiments were performed (real-time PCR Systems StepOne plus, Applied Biosystems) in triplicate. Data were quantified for the above genes using the comparative Ct method, as described in the Assays-on-Demand Users Manual (Applied Biosystems).

qPCR Primers (Sybr green):

catcgtggagaaggctccta- gabarap1 (mF)  
atacagctggcccatgtag- gabarap1 (mR)  
AACAAAGAAATGGGCTGTGG – ATG12 (mF)  
TTGCAGTAATGCAGGACCAG- ATG12 (mR)  
CCTCGTCTCCATCCACAAT- bnip3l (mF)  
GTCCCTGCTGGTATGCATCT- bnip3l (mR)  
TGGCCACCTCTGATAGCT- p62 (mF)  
TCATCGTCTCCTCTGAGCA- p62 (mR)

### ChIP

Approximately  $7 \times 10^6$  cells were fixed with 1% formaldehyde (Sigma-Aldrich, Cat#: F8775) at room temperature for 10 min followed by ChIP using ChIP assay Kit from Millipore-Sigma (17-295). Cells were then harvested and lysed in 500 mL of ChIP lysis Buffer (50 mM Tris-HCl pH 8.0, 5 mM EDTA, 150 mM NaCl, 0.5% Triton X-100, 0.5% SDS, 0.5% NP-40, 1 mM sodium butylate) containing protease inhibitor cocktail. The lysates were subjected to sonication to shear DNA to a length of approximately between 150 and 900 bp. The lysate was then diluted in 1.2 mL of ChIP dilution buffer and incubated with control IgG (Cell Signaling Technology, Cat#: 2729S) or primary antibody H4k16ac (Active Motif 39168) 4C overnight. Then the lysate was incubated with Protein A/ Salmon

sperm slurry (provided in kit) for 1 h at 4°C. The beads were washed sequentially with wash buffer provided in kit. The immunocomplexes were eluted with 75 mL of elution buffer (1% SDS, 0.1 M NaHCO<sub>3</sub>) twice at 65°C for 30 min. After elution, the cross-link was reversed by adding NaCl and incubated together with Proteinase K (Thermo Fisher Scientific, Cat#: EO0491) overnight at 65°C. ChIP DNA was purified using ChIP DNA purification kit (Actif motif 58002). The purified DNA was analyzed on a StepOnePlus using power SYBR Green Master Mix. The results are presented as percentage of input. qPCR analyses were done in triplicate. We used LC3B primers:(F) CATGCCTTGGGACACCAGAT, (R) ACCTTCTCAAGTGCTGTTTGT (45).

### Confocal microscopy of autophagy

IPMK WT and KO MEFs were stably transfected with LC3 GFP. IPMK WT and KO cells were transiently transfected with NeoR-GFP and GFP-WIP12 constructs using lipofectamine 3000. Cells were treated with different conditions and images were captured in a confocal microscope using Zeiss LSM 800. Images were analyzed with Zenlite software. The puncta were counted using Imaris x64 7.7.2 software. The intensity of NeoR-GFP was analyzed using ImageJ.

### Western blots

Cell lysates were prepared using lysis buffer (150 mM NaCl, 0.5% CHAPS, 0.1% Triton, 0.1% BSA, 1 mM EDTA, protease inhibitors, phosphatase inhibitors). Samples were centrifuged at 14,000 g for 20 min, and the protein concentration of the supernatant was measured. Proteins were resolved by SDS-polyacrylamide gel electrophoresis and transferred to PVDF membranes. The membranes were blocked for 2 h at room temperature in 20 mM Tris-HCl, pH 7.4, 150 mM NaCl, and 0.02% Tween 20 (Tris-buffered saline/Tween 20) containing 3% BSA followed by overnight incubation at 4°C in 1:1000 dilution of the respective antibodies for LC3, actin, ULK1, ULK Ser 555, ULK Ser 317, ULK Ser 777, ULK Ser 757, ATG 13, ATG 13 Ser 318, Bnip3l, ATG12, GABARAPL1, H4k16ac, H4, Sirt-1, DBC1, GFP, AMPK, AMPK Thr 172, FIP200, ATG101, anti-myc, anti-gst, anti-HA, anti-Flag in 3% BSA. The PVDF membrane (Millipore) was washed three times with Tris-buffered saline/Tween-20, incubated with HRP-conjugated secondary antibody (GE health care), and the bands visualized by chemiluminescence (Pierce). The depicted blots are representative replicates selected from at least three experiments. Densitometric analysis was performed using ImageJ software.

### Immunoprecipitations

pCMV mycIPMK or pCMV myc were cotransfected with pCMV Flag or pCMV ULK1 plasmids into HEK293 cells using polyfect (QIAGEN). Forty-eight hours after transfection, immunoprecipitation of the myc or Flag tagged protein was performed with 500 µg of protein lysates in lysis buffer (150 mM NaCl, 0.5% CHAPS, 0.1% Triton, 0.1% BSA, 1 mM EDTA, protease inhibitors, phosphatase inhibitors) incubated overnight at 4°C EZview myc or Flag beads (Sigma). Beads were pelleted and washed with lysis buffer 3 times, and SDS sample buffer loading dye was added. Immunoprecipitated samples were resolved by polyacrylamide gel electrophoresis. To assess interactions between IPMK and AMPK, HEK293 cells were co-transfected with pCMV mycIPMK or pCMV myc with Flag AMPK followed by immunoprecipitation of myc using the above-mentioned protocol. In the same way, different IPMK gst fragments were co-transfected either with myc ULK1 or myc AMPK to map the IPMK binding site.

To analyze Sirt-1/AMPK and IPMK/Sirt-1 interaction we overexpressed myc Ampk and Flag Sirt in one reaction myc IPMK and Flag Sirt-1 with empty myc as control. We immunoprecipitated myc using EZview myc beads and western blot flag to check the interaction.

### In vitro AMPK mediated ULK phosphorylation

*In Vitro* assay was performed as previously reported (30). Recombinant GST-hULK1 protein (ThermoFisher) 500 ng was incubated with 10 ng of recombinant purified AMPK complex (Signal Chem) in kinase assay buffer (20 mM HEPES at pH 7.4, 1 mM EGTA, 0.4 mM EDTA, 5 mM MgCl<sub>2</sub> and 0.05 mM DTT) supplemented with 0.2 mM AMP and 0.1 mM cold ATP, for 20 min. Recombinant myc-human IPMK was added to the kinase reaction (100 ng, 500 ng and 1 µg). After the reaction, western blot of ULK S 777 was performed to test the importance of IPMK.

### Mice Liver toxicity and regeneration study

IPMK F/F and F/F-AlbCre mice were treated acutely with carbon tetrachloride (Ccl<sub>4</sub>) 2 µl/g. 48 h after treatment serum was collected from blood through cardiac puncture followed by analysis of liver specific serum chemistry for alanine-leucine transaminase (ALT). Liver tissue was fixed in 4% formalin followed by sectioning at 5 µm thickness. Sections were stained with hematoxylin and eosin (H&E), and immunostained with F4/80 (biorad), Ki67 (Abcam) and TUNEL staining followed by light microscopy. To study liver regeneration mice were intraperitoneally injected with 100 µg/g Edu 2h before harvesting liver. Further liver sections were stained with Click-it Edu staining kit (Thermofisher) followed with imaging by confocal microscopy.

### Analysis of lipophagy

IPMK WT and KO MEFs were cultured in regular medium (RM) or oleate (OL) 0.25mM for 24h in serum free medium followed by staining lipid droplets with BODIPY 493/503 dye as per manufacturer's protocol (Thermofisher). To study accumulation of lipid droplets in mice liver, mice were either maintained on regular diet or starved overnight, liver tissue was either processed for transmission electron microscopy or tissue samples were cryosectioned for oil red o (ORO) of lipid droplets in liver as per manufacturer's protocol, abcam.

### Endogenous immunoprecipitation analysis

To analyze binding of IPMK to endogenous ULK1, gst IPMK was transfected in HEK293 cells. Forty-eight h after transfection, immunoprecipitation of the gst tagged IPMK was performed with 500  $\mu$ g of protein lysates in lysis buffer (150 mM NaCl, 0.5% CHAPS, 0.1% Triton, 0.1% BSA, 1 mM EDTA, protease inhibitors, phosphatase inhibitors) incubated overnight at 4°C EZview gst beads (Sigma). Beads were pelleted and washed with lysis buffer 3 times, and SDS sample buffer loading dye was added. Immunoprecipitated samples were resolved by polyacrylamide gel electrophoresis followed by western blotting of ULK1 using ULK1 specific antibody (Santacruz Biotechnology). Immunoprecipitation of endogenous ULK1 was further confirmed using siRNA analysis (Santacruz Biotechnology). For DBC1/Sirt-1 interaction studies we immunoprecipitated endogenous Sirt-1 using Sirt-1 specific antibody and western blot with DBC1. We immunoprecipitated endogenous ULK1 using ULK1 antibody and western blot for AMPK, FIP200, ATG101, and ATG 13 from IPMK WT and KO MEF to analyze endogenous interaction of these proteins with ULK.

### In vitro binding assay

Recombinant myc IPMK (Origene) was co-incubated with either recombinant gst ULK1 (Signalchem) or His AMPK (Signalchem) in lysis buffer and the complex maintained for 30 min at 4°C. After the addition of myc beads incubation was continued for an additional 15 min and washed 3 times with ice cold lysis buffer. SDS sample buffer was added. Binding was confirmed by western blotting of gst or His. The purity of recombinant proteins was confirmed by resolving single bands in NuPAGE protein gels that were stained with Simply Blue Safe Stain (Invitrogen).

### Transfections

#### a. Retroviral transfection and generation of stably transfected cells:

Retroviral constructs (5) were transiently transfected into a Platinum-E retroviral packaging cell line for 48 h by using Lipofectamine 2000 transfection reagent. The high-titer viral stocks were produced by passing the supernatant using a 0.45  $\mu$ m pore size-filter. For infection, MEFs were incubated with the viral supernatant in the presence of polybrene (8  $\mu$ g/mL) for 48 h. Stably infected MEFs were selected with blasticidin (4  $\mu$ g/mL) for 1-2 weeks. Selected stable cell lines were always maintained in respective medium containing blasticidin (4  $\mu$ g/mL).

#### b. Transient Polyfect and lipofectamine 3000 transfection:

HEK293 cells were transiently transfected with polyfectamine (QIAGEN) using manufacturer's protocol. MEF cells were transiently transfected with lipofectamine 3000 using manufacturer's protocol.

### Intracellular inositol content profiling

MEFs were plated at a density of 250,000 cells per 60 mm plate, then labeled with 60  $\mu$ Ci (1 Ci = 37 GBq) [3H]myo-inositol (PerkinElmer) in conventional cell culture media for three days. To extract soluble inositol phosphates, cell pellets were suspended in 300  $\mu$ L of ice-cold 0.6 M perchloric acid buffer (0.1 mg/mL IP6, 2 mM EDTA) and incubated on ice for 1 min. Ninety  $\mu$ L of 1 M potassium carbonate with 5 mM EDTA were added and incubated on ice for 1 h. Extracts were centrifuged at 12,000 rpm for 15 min. The supernatant was collected and analyzed by HPLC using a Partisphere SAX column (Whatman Inc.). The column was eluted with a gradient generated by mixing Buffer A (1 mM EDTA) and Buffer B (Buffer A plus 1.3 M (NH<sub>4</sub>)<sub>2</sub>HPO<sub>4</sub>, pH 3.8 with H<sub>3</sub>PO<sub>4</sub>). The 1 mL fractions were collected and counted using 5 mL of Ultima-Flo AP mixture (PerkinElmer).

### Lentiviral Transduction

786-0 human renal cancer cell was transduced with shRNA particles (Sigma) to knock down IPMK and selected cells using puromycin (0.5 micro gram/ ml) antibiotic.

## QUANTIFICATION AND STATISTICAL ANALYSIS

Error bars in the figures represent standard error of the mean and number of experiments is indicated by n in figure legends. n indicates animals employed for the experiment or times an experiment was performed. Specifics are indicated in the figure legends. Statistical significance (two-tails) was tested with Student's T-Test for two groups or one-way ANOVA for multiple groups with similar size. The differences were considered significant when  $p < 0.05$ . All the statistical analysis was performed with Prism 7 program (GraphPad).



**Cell Reports, Volume 26**

**Supplemental Information**

**IPMK Mediates Activation of ULK Signaling  
and Transcriptional Regulation of Autophagy Linked  
to Liver Inflammation and Regeneration**

**Prasun Guha, Richa Tyagi, Sayan Chowdhury, Luke Reilly, Chenglai Fu, Risheng Xu, Adam C. Resnick, and Solomon H. Snyder**

Figure S 1

IPMK  
(untreated)

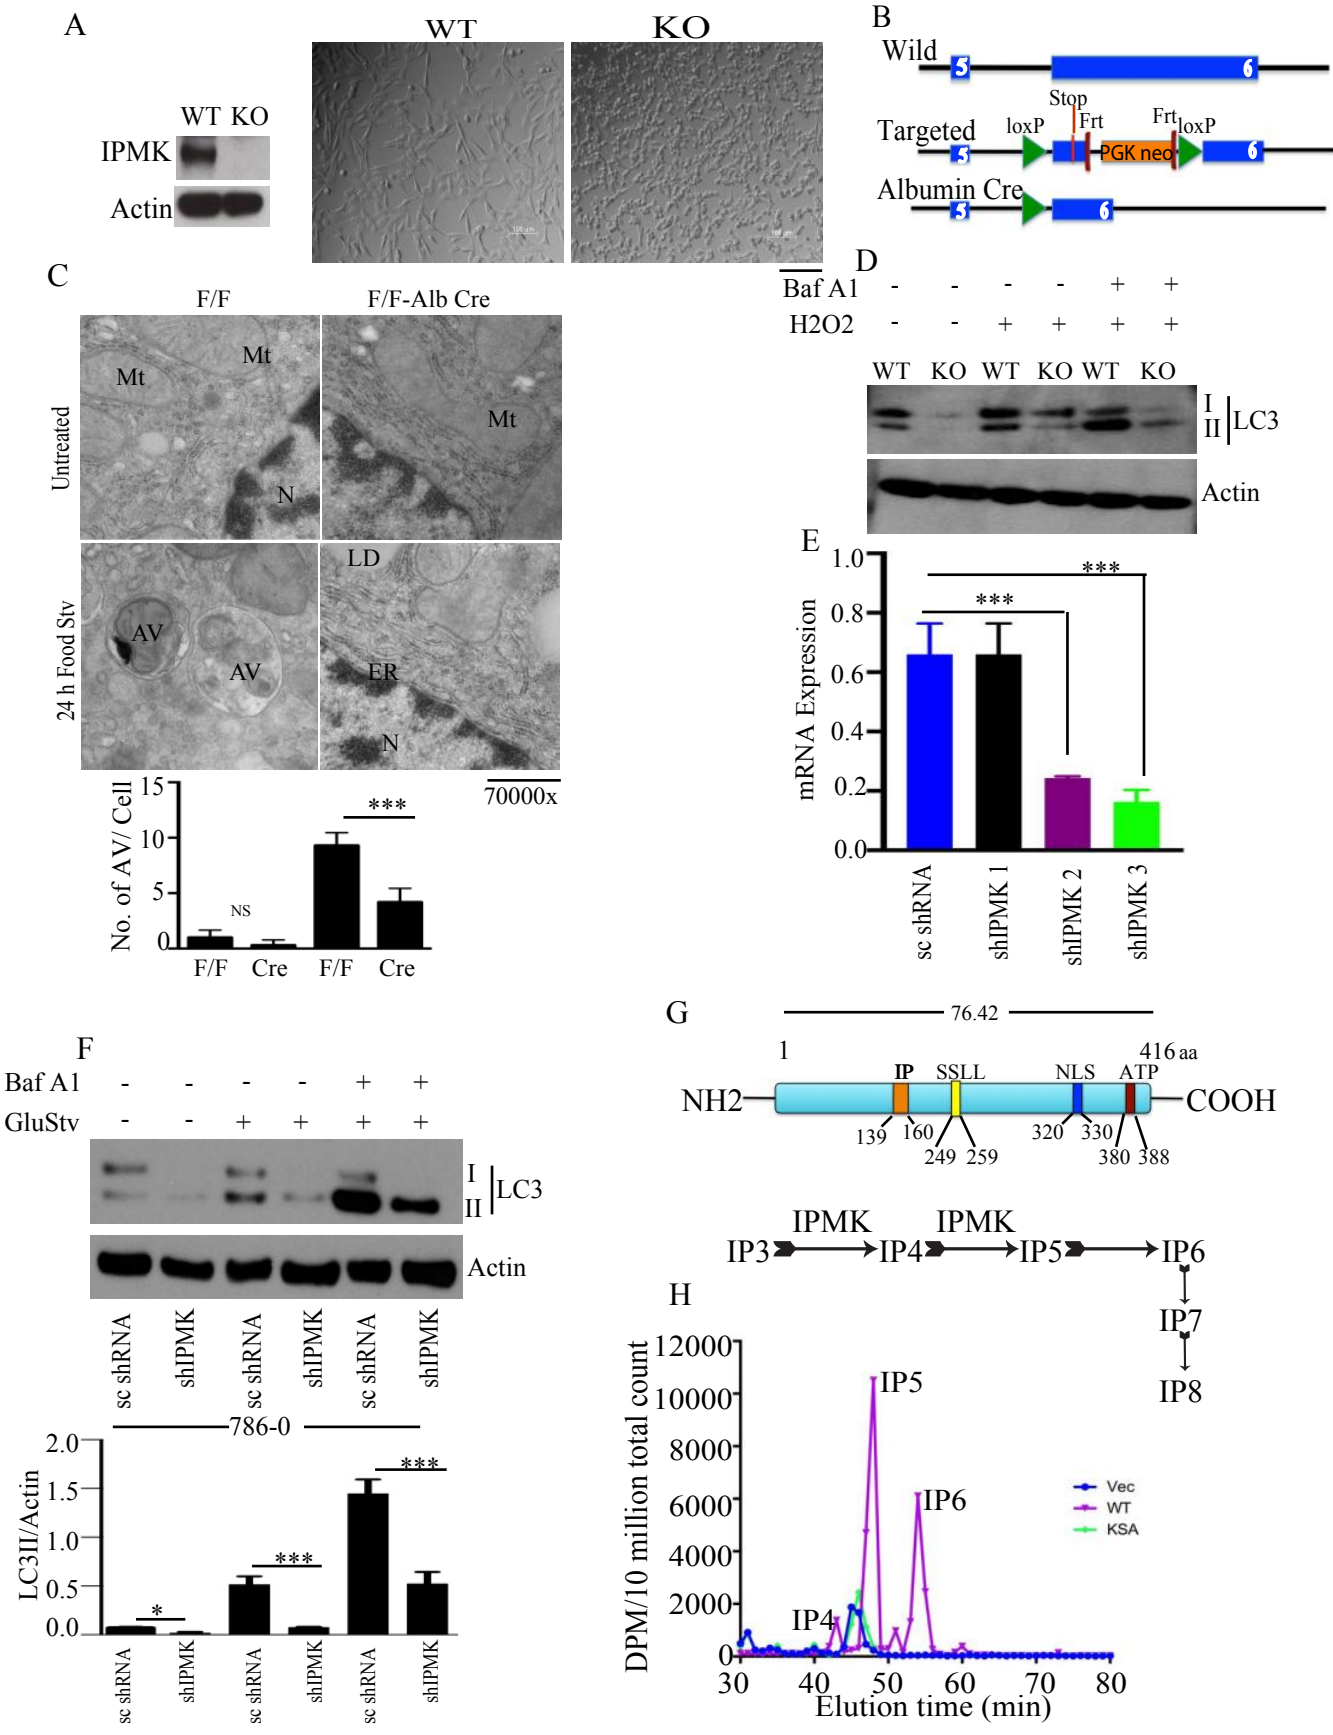

**Figure S1. IPMK is required for autophagy, Related to Figure 1.**

(A) Western blot of IPMK in W and KO MEF. Phase contrast microscopy of W and KO MEFs. Scale bar 100uM. (B) Schematic diagram for generation of conditional IPMK deletion in mice liver. (C) TEM analysis of F/F and F/F-AlbCre (IPMK KO) liver section with and without food for 24 h. Mt- mitochondria, AV- autophagic vacuole, LD- lipid droplet, N- nucleus, and ER- endoplasmic reticulum. Scale bar 500nm. (D) LC3 western blot to study autophagic flux in IPMK W and KO MEF after H<sub>2</sub>O<sub>2</sub> (500uM) and H<sub>2</sub>O<sub>2</sub>+BafA1 treatment for 1h. (E) qPCR analysis of IPMK mRNA expression after shRNA treatment in 786-0 renal cancer cell line. (F) LC3 western blot to study autophagic flux in stably transfected scrambled shRNA and shIPMK (shIPMK3) treated 786-0 renal cancer cells. (G) Schematic map of IPMK protein. Wild type human IPMK is a 76.42-kb gene consisting of 6 exons and 5 introns encoding a 416 amino acid protein with at least 4 structural domains including an inositol phosphate (IP, orange) binding site, Ser-Ser-Leu-Leu catalytically important domain (SSLL, yellow), NLS (nuclear localization signal, blue), and adenosine triphosphate (ATP) binding site (magenta). IPMK catalyzes conversion of IP<sub>3</sub> to IP<sub>4</sub> and IP<sub>5</sub>. (H) HPLC analysis of inositol phosphate levels in IPMK KO rescued by vector control (KO + myc), wild type IPMK (KO + WT), kinase dead IPMK (KO + KSA). Data are means ± SD.

Figure S 2

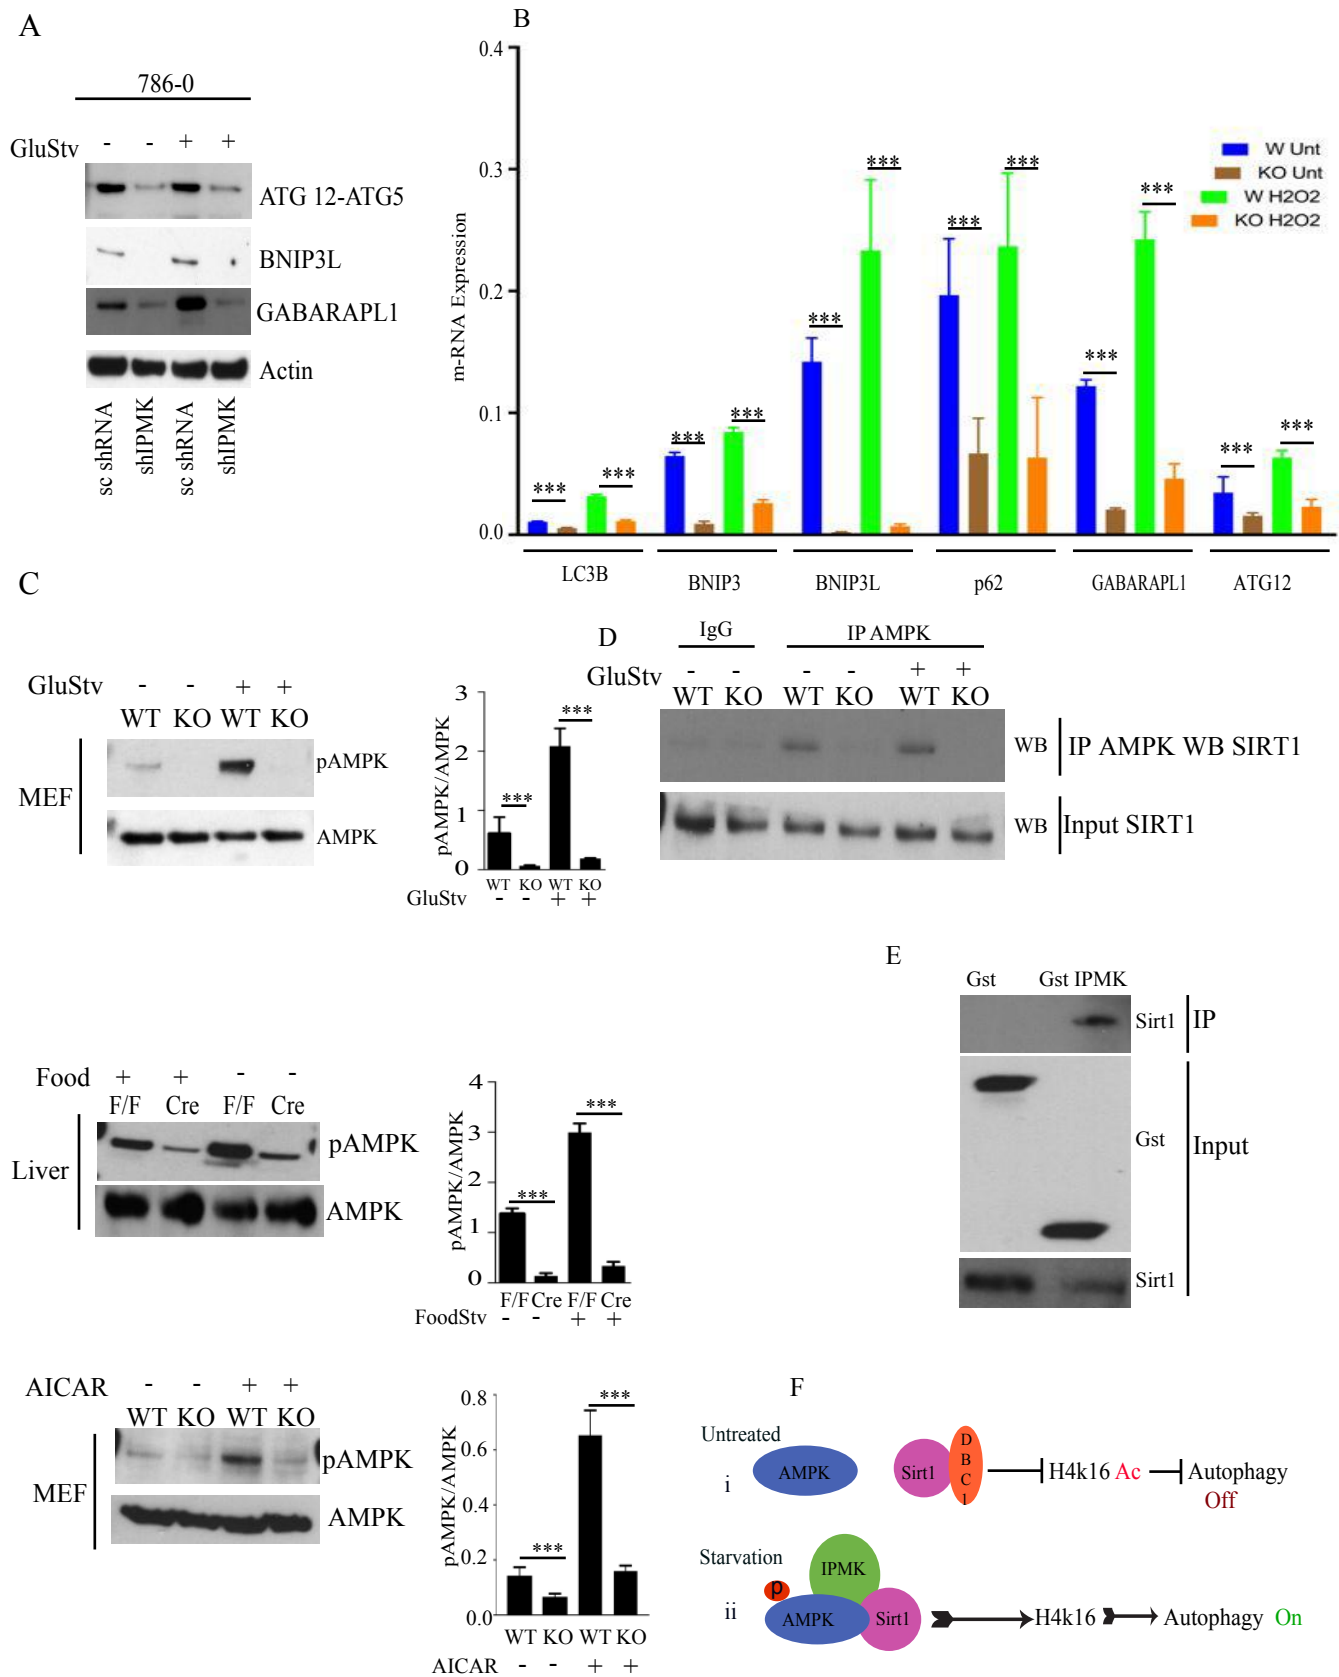

**Figure S2. IPMK enhances transcription of autophagy related genes, Related to Figure 2.**

(A) Western blot of BNIP3L, ATG12 and GABARAPL1 in 786-0 cells stably transfected with scrambled shRNA and shIPMK. (B) qPCR analysis of LC3B, BNIP3, BNIP3L, p62, GABARAPL1, and ATG12 in H<sub>2</sub>O<sub>2</sub> (500uM) treated W/KO MEF. (C) Western blot of phosphoAMPK at Thr 172 in AICAR treated W/KO MEFs and liver tissue from mice. (D) Immunoprecipitation of endogenous AMPK and western blot of endogenous Sirt1. (E) Immunoprecipitation of GST IPMK and western blot of endogenous Sirt1. (F) Schematic diagram of IPMK mediated Sirt1 activation and transcriptional regulation. In untreated cells Sirt1 activity is down-regulated by direct binding of its repressor DBC1. IPMK and AMPK can interact with Sirt1. During glucose starvation IPMK enhances activation of AMPK which enables DBC1 to dissociate from Sirt1 followed by deacetylation of H4K16 and activation of autophagy related gene transcription. Data are means  $\pm$  SD.



Figure S 3

A

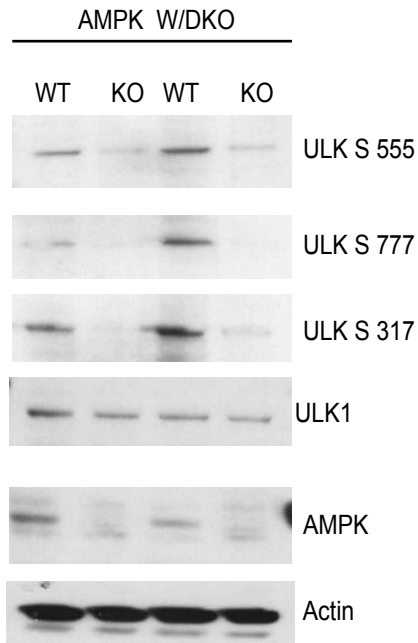

B

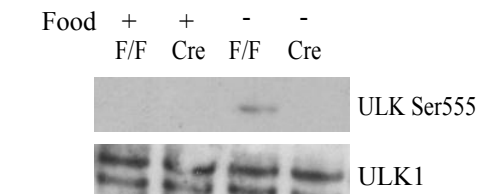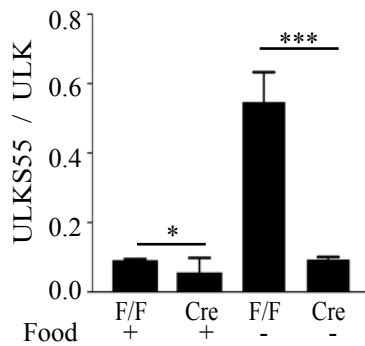

**Figure S3. IPMK regulates autophagy through ULK phosphorylation, Related to Figure 3.**

(A) Immunoblot of ULK ser 555, 777, 317 from AMPK double knock (alpha 1/2) out MEFs. (B) Immunoblot of ULK ser 555 in Flox/Flox and IPMK KO (AlbCre) mice liver after 24 h food deprivation.

Figure S 4

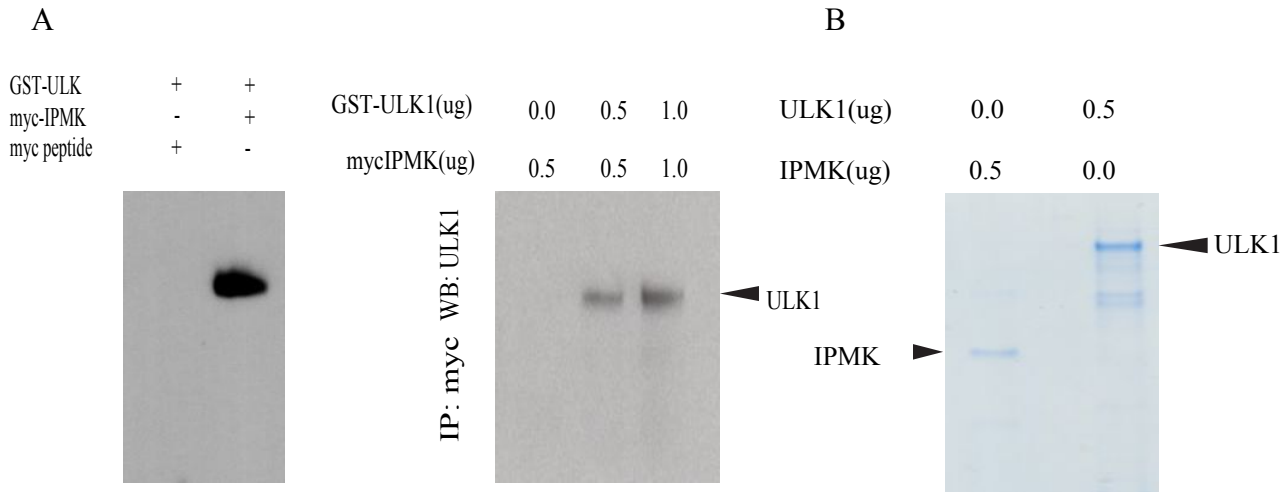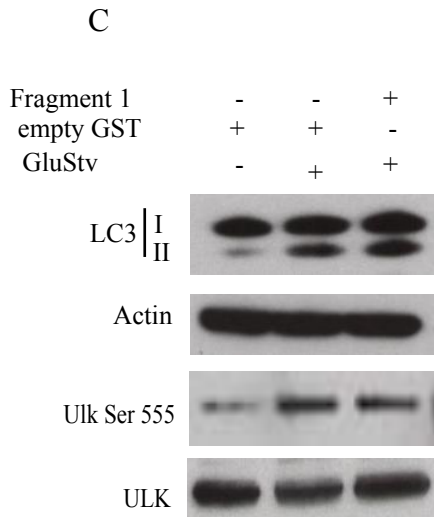

**Figure S4. IPMK interacts with ULK1, Related to Figure 4.**

(A) Recombinant mycIPMK was incubated with recombinant ULK1. Myc IPMK was immunoprecipitated and western blot performed for ULK1. (B) Validation of purity of recombinant protein in NuPAGE gel electrophoresis. (C) Fragment 1 of IPMK was transiently transfected in HEK293 cells followed by glucose starvation to analyze effects of fragment 1 on LC3II and ULK Ser 555.

Figure S 5

A

|             |   |   |              |     |      |     |     |
|-------------|---|---|--------------|-----|------|-----|-----|
| His-AMPK    | + | + | His-AMPK(ug) | 0.0 | 0.25 | 0.5 | 1.0 |
| myc-IPMK    | - | + | myc-IPMK(ug) | 0.0 | 0.25 | 0.5 | 1.0 |
| myc peptide | + | - |              |     |      |     |     |

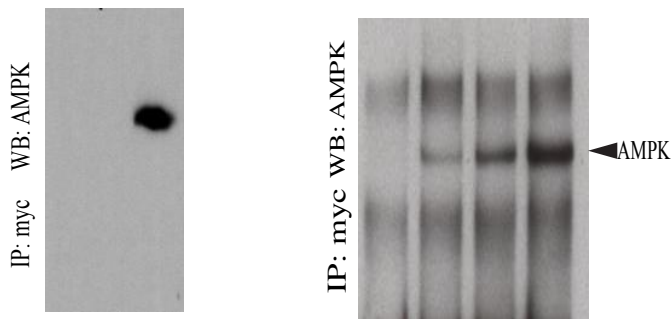

B

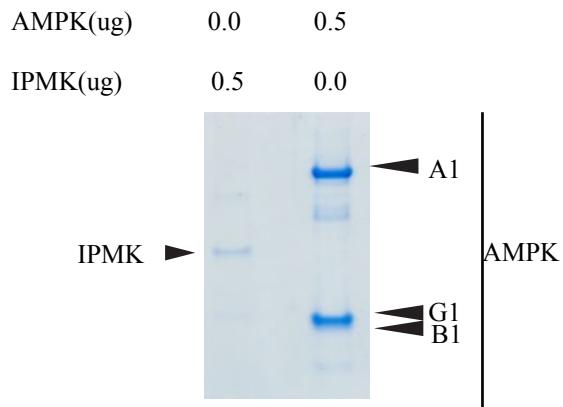

C

|            |   |   |   |
|------------|---|---|---|
| Fragment 5 | - | - | + |
| empty GST  | + | + | - |
| GluStv     | - | + | + |

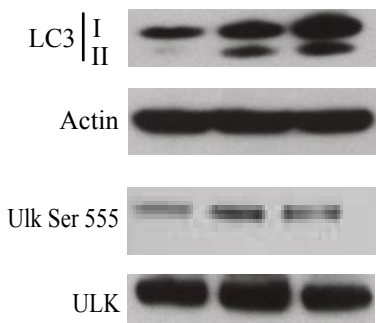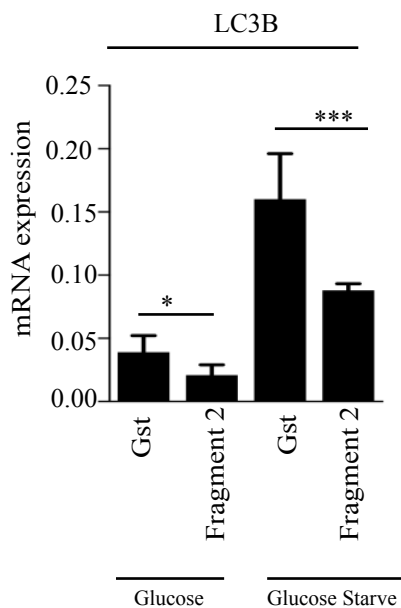



**Figure S5.**

**IPMK interacts with AMPK, Related to Figure 5.**

(A) Recombinant mycIPMK was incubated with recombinant AMPK. Myc-IPMK was immunoprecipitated, and samples were western blotted for AMPK. (B) Validation of purity of recombinant protein in NuPAGE gel electrophoresis. (C) Fragment 5 of IPMK was transiently transfected in HEK293 cells followed by glucose starvation to analyze effects of fragment 1 on LC3II and ULK Ser 555. (D) Transcription of LC3B mRNA.  $p < 0.05$  \*,  $p < 0.001$  \*\*\* . Data are means  $\pm$  SD.

Figure S 6

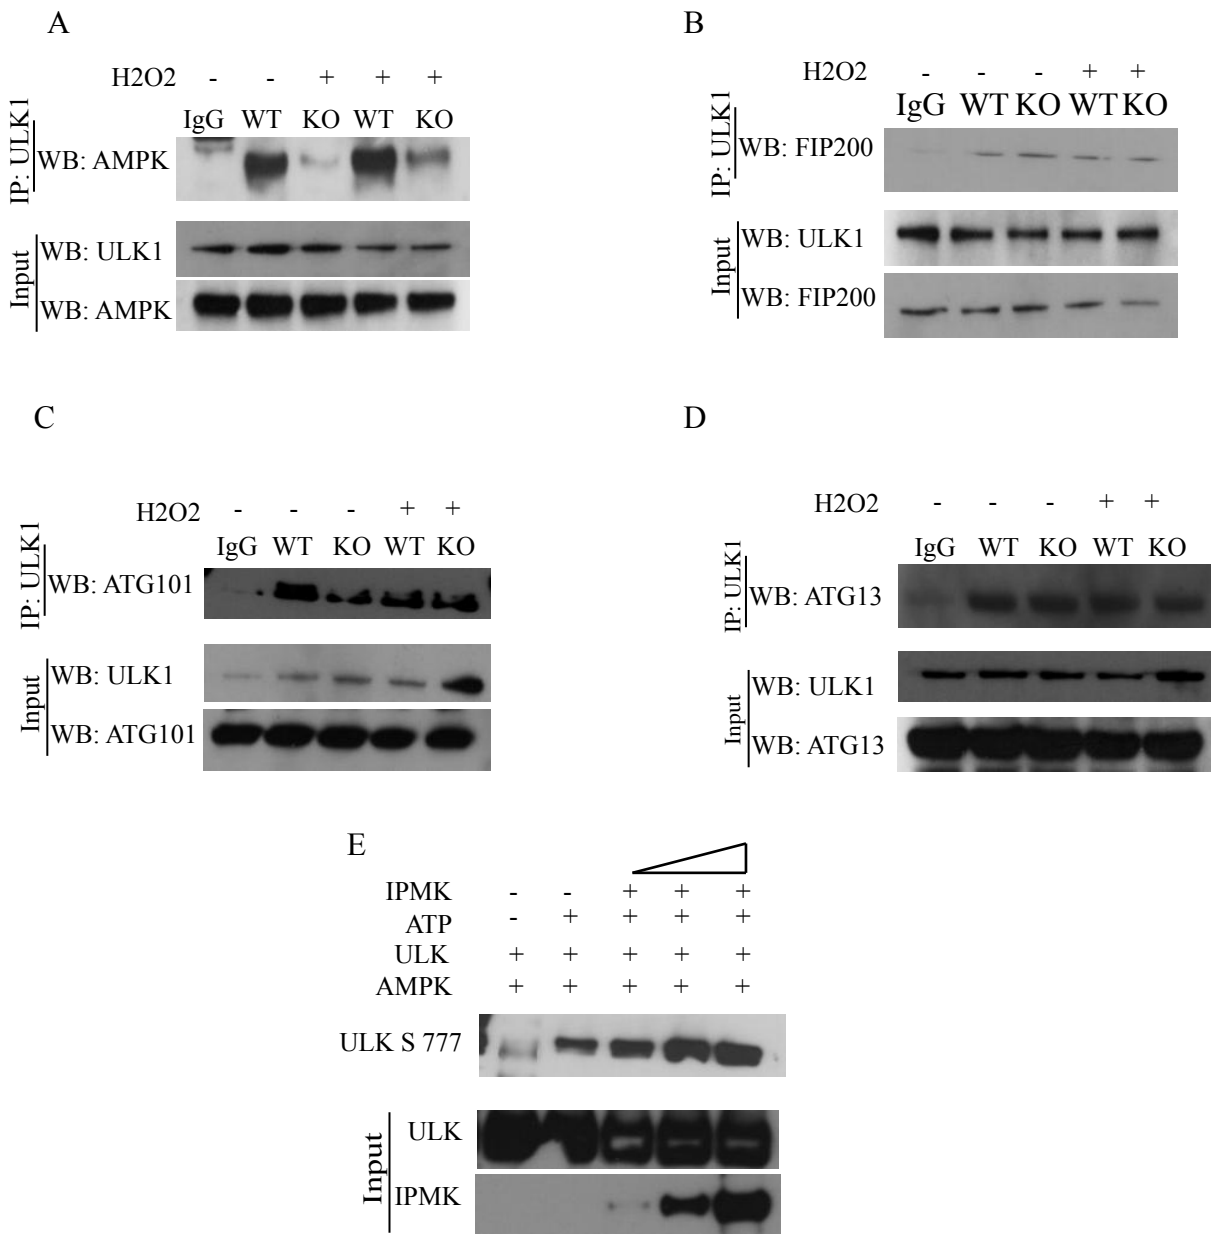

**Figure S6.**

**IPMK is essential for AMPK/ULK1 interactions, Related to Figure 6.**

(A) IPMK wild type and KO MEFs were treated with H<sub>2</sub>O<sub>2</sub> (500  $\mu$  M). The role of IPMK as a scaffold was analyzed by immunoprecipitation of endogenous ULK1 and western blot of endogenous AMPK, (B) FIP200, (C) ATG101, (D) ATG13. In vitro AMPK dependent ULK phosphorylation, in presence of increasing amounts (100ng, 500ng, 1 $\mu$ g) of recombinant human IPMK (E).

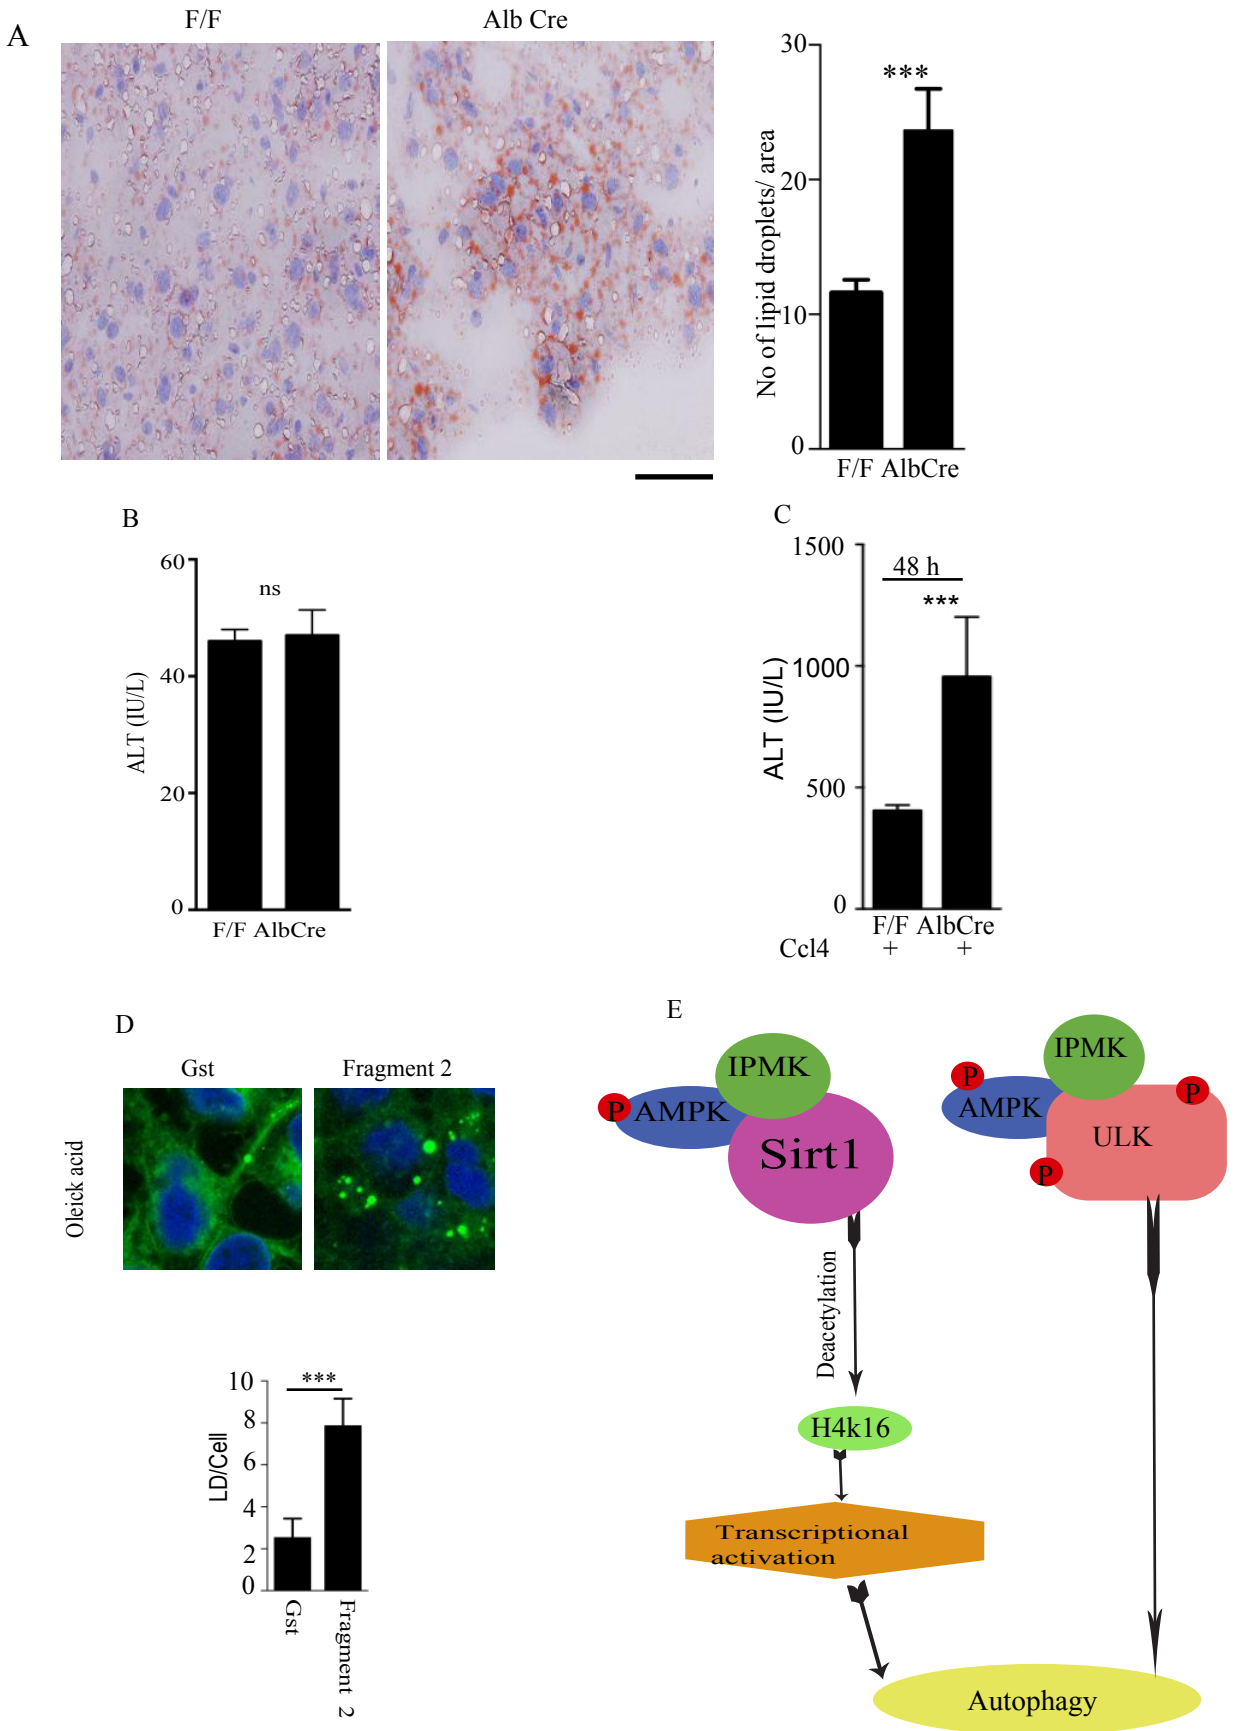

**Figure S7. IPMK is required for lipophagy and cytoprotection , Related to Figure 7.**

(A) IPMK F/F and Alb (Cre) mice were starved for 24h and the livers harvested for Oil red O (ORO) staining to quantitate accumulated lipid droplets. Numbers of lipid droplets were counted and represented as bars. (n=3),  $p < 0.001$  \*\*\*. Data are means  $\pm$  SD. Scale bar 200 $\mu$ M (B) Serum ALT level in untreated mice, (n=5), Data are means  $\pm$  SD. (C) Serum ALT level in Ccl4 treated mice, (n=5),  $p < 0.001$  \*\*\*; Data are means  $\pm$  SD. (D) Lipid droplet counts in HEK 293 cells after fragment 2 over expression. (E) Schematic diagram of IPMK mediated autophagy induction. IPMK interacts with target proteins to form signaling complexes. IPMK-AMPK-Sirt1 signaling axis enhances AMPK activation followed by Sirt1 dependent deacetylation of H4K16ac resulting in transcriptional activation of autophagy related genes. In the IPMK-AMPK-ULK signaling axis, IPMK forms a ternary complex and promotes AMPK dependent ULK phosphorylation leading to activation of autophagy.
